# Supplementary material for: Causal analysis between altered levels of interleukins and obstructive sleep apnea
Source: PubMed Central journal article supplement (PMC9363575; doi:10.3389/fimmu.2022.888644), 2022-07-27
Supplement: DataSheet_1.pdf [file DataSheet_1.pdf]

## Supplemental material 1: Supplemental Tables.

**Supplemental Table 1.** Characteristics of the included literature for Interleukins (ILs) protein level and OSA

| Study ID                      | Groups   | No. | ILs pg/ml<br>mean±SD | AHI events/h | Age years   | BMI kg/m <sup>2</sup>     | Sex<br>M/F | Sample<br>source    | Detection Methods                                    |
|-------------------------------|----------|-----|----------------------|--------------|-------------|---------------------------|------------|---------------------|------------------------------------------------------|
| <b>IL-1<math>\beta</math></b> |          |     |                      |              |             |                           |            |                     |                                                      |
| Chen B. 2021                  | mild     | 20  | 7.29±3.43            | 11.09±3.04   | 43.80±9.61  | 28.45±5.90                | 14/6       | serum               | ELISA                                                |
|                               | moderate | 24  | 10.69±3.83           | 23.84±3.64   | 45.13±10.83 | 31.90±6.07                | 17/7       |                     |                                                      |
|                               | severe   | 23  | 13.17±5.50           | 74.80±21.24  | 44.78±11.64 | 33.23±6.16                | 18/5       |                     |                                                      |
|                               | control  | 30  | 2.67±1.89            | 3.06±1.35    | 44.77±10.67 | 26.15±3.55                | 21/9       |                     |                                                      |
| Celikhisar H.<br>2020         | mild     | 28  | 11.80±7.04           | /            | /           | /                         | 28/0       | serum               | ELISA                                                |
|                               | moderate | 26  | 17.20±5.96           | /            | /           | /                         | 26/0       |                     |                                                      |
|                               | severe   | 30  | 23.74±2.98           | /            | /           | /                         | 30/0       |                     |                                                      |
|                               | control  | 82  | 1.70±0.21            | /            | /           | /                         | 82/0       |                     |                                                      |
| Chen V.G. 2020                | mixed    | 17  | 102.03±112.98        | /            | /           | /                         | /          | Palatine<br>tonsils | Milliplex-Human<br>Cytokine/Chemokine<br>reading kit |
|                               | control  | 17  | 97.26±139.67         | /            | /           | /                         | /          |                     |                                                      |
| Dalesio N.M.<br>2020          | severe   | 7   | 0.17±0.07            | /            | /           | /                         | /          | blood               | /                                                    |
|                               | control  | 12  | 0.22±0.4             | /            | /           | /                         | /          |                     |                                                      |
| Huang Y.S.<br>2020            | mixed    | 55  | 1.51±2.25            | 15.71±22.60  | 7.67±2.64   | 16.83±4.03<br>(BMI score) | 36/19      | serum               | ELISA                                                |
|                               | control  | 32  | 0.42±1.38            | 0.46±0.28    | 7.02±0.65   | 17.44±3.08<br>(BMI score) | 21/11      |                     |                                                      |
| Tang T. 2019                  | mixed    | 120 | 23.00±2.87           | 39.00±18.38  | 48.88±9.76  | 26.86±3.12                | 96/24      | serum               | ELISA                                                |
|                               | mild     | 9   | 20.10±1.48           | 10.63±4.00   | 50.33±10.26 | 25.76±1.45                | /          |                     |                                                      |
|                               | moderate | 33  | 22.89±1.92           | 23.59±3.77   | 48.82±8.58  | 27.71±3.34                | /          |                     |                                                      |
|                               | severe   | 78  | 24.92±2.86           | 48.78±14.81  | 48.73±10.51 | 27.66±3.14                | /          |                     |                                                      |
|                               | control  | 127 | 20.86±2.56           | 3.31±1.09    | 47.37±9.12  | 22.46±3.29                | 100/27     |                     |                                                      |

|                        |                 |    |             |             |             |            |       |        |       |
|------------------------|-----------------|----|-------------|-------------|-------------|------------|-------|--------|-------|
| Kong Y. 2018           | mixed           | 50 | 27.15±5.91  | 37.34±19.02 | 54.34±14.38 | 26.86±3.12 | 34/16 | serum  | ELISA |
|                        | mild            | 10 | 20.10±1.47  | 10.14±2.95  | 59.60±15.13 | 27.04±2.58 | /     |        |       |
|                        | moderate        | 15 | 24.35±3.83  | 22.88±3.93  | 56.73±15.93 | 26.81±3.80 | /     |        |       |
|                        | severe          | 25 | 29.15±5.91  | 49.11±14.96 | 52.27±13.54 | 27.28±3.16 | /     |        |       |
|                        | control         | 40 | 21.17±1.70  | 3.31±1.09   | 50.42±8.35  | 22.26±3.54 | 31/9  |        |       |
| Gamsiz-Isik H. 2017    | mixed           | 83 | 38.82±26.42 | /           | 46.87±8.21  | 31.53±3.44 | 65/18 | GCF    | ELISA |
|                        | mild            | 16 | 34.35±24.2  | /           | /           | /          | /     |        |       |
|                        | moderate-severe | 67 | 39.82±26.92 | /           | /           | /          | /     |        |       |
|                        | control         | 80 | 19.25±17.65 | /           | 44.23±9.83  | 30.91±3.31 | 57/23 |        |       |
| Huang Y.S. 2016        | mixed           | 47 | 0.36±0.16   | 9.13±1.67   | 7.84±0.56   | 16.95±0.47 | 30/17 | serum  | ELISA |
|                        | control         | 32 | 0.42±0.27   | 0.37±0.06   | 7.02±0.65   | 16.55±0.58 | 21/11 |        |       |
| Medeiros C. A. M. 2012 | mild-moderate   | 15 | 0.00±0.0    | /           | 62.62±9.0   | 24.50±3.8  | 11/4  | serum  | ELISA |
|                        | severe          | 35 | 1.22±4.6    | /           | 65.0±7.2    | 25.9±4.1   | 20/15 |        |       |
|                        | control         | 15 | 0.00±0.0    | /           | 62.50±8.4   | 25.81±4.04 | 6/9   |        |       |
| Sahlman J. 2010        | mild            | 84 | 0.19±1.51   | 9.6±2.9     | 50.4±9.3    | 32.5±3.3   | 64/20 | plasma | ELISA |
|                        | control         | 40 | 0.23±1.31   | 1.9±1.4     | 45.6±11.5   | 31.5±3.5   | 25/15 |        |       |
| Constantinidis J. 2008 | mixed           | 13 | 0.28±0.11   | 3.4±0.3     | /           | 33.4±1.5   | 13/0  | serum  | ELISA |
|                        | control         | 12 | 0.66±0.21   | 23.6±3.5    | /           | 27.4±0.8   | /     |        |       |
| Tomiyama H. 2008       | mild            | 10 | 0.35±0.12   | 11±3        | 49±14       | 25.1±4.5   | 10/0  | plasma | ELISA |
|                        | moderate        | 12 | 0.40±0.28   | 24±5        | 52±17       | 25.0±2.0   | 12/0  |        |       |
|                        | severe          | 28 | 0.43±0.33   | 62±22       | 52±11       | 28.3±4.3   | 28/0  |        |       |
|                        | control         | 15 | 0.33±0.16   | /           | 53±10       | 24.3±2.5   | 15/0  |        |       |

**IL-6**

|                    |         |    |         |           |             |            |      |       |                                                                                                    |
|--------------------|---------|----|---------|-----------|-------------|------------|------|-------|----------------------------------------------------------------------------------------------------|
| Kotsiou O. S. 2022 | mixed   | 15 | 3.4±1.0 | 39.3±16.7 | 57.2 ± 8.2  | 40.8 ± 2.7 | 11/4 | serum | two-site sandwich quantitative enzyme-linked immunosorbent assay using commercially available kits |
|                    | control | 15 | 2.3±0.3 | 3.9±1.0   | 55.5 ± 13.7 | 38.7 ± 4.7 | 13/2 |       |                                                                                                    |

|                   |          |     |             |             |             |             |        |                  |                                                |
|-------------------|----------|-----|-------------|-------------|-------------|-------------|--------|------------------|------------------------------------------------|
| Bhatt S. P. 2021  | mixed    | 190 | 20.1±5.6    | ≥1          | 10.71±3.00  | 27.1±6.53   | 92/41  | serum            | /                                              |
|                   | control  | 57  | 15.4±3.5    | < 1         | 11.87±2.66  | 27.4±4.88   | 21/11  |                  |                                                |
| Bilal N. 2021     | mild     | 10  | 44.46±5.91  | 9.70±2.77   | 42.70±14.25 | 30.65±6.98  | 5/5    | serum            | ELISA                                          |
|                   | moderate | 10  | 42.74±2.49  | 20.24±4.40  | 47.00±9.63  | 30.66±7.76  | 8/2    |                  |                                                |
|                   | severe   | 10  | 57.98±5.96  | 44.01±10.07 | 43.30±7.42  | 29.93±3.71  | 7/3    |                  |                                                |
|                   | control  | 30  | 40.57±3.47  | 2.62±1.34   | 42.53±9.81  | 29.09±4.52  | 14/16  |                  |                                                |
| Chen V.G. 2020    | mixed    | 17  | 6.66±3.91   | /           | /           | /           | /      | palatine tonsils | Milliplex-Human Cytokine/Chemokine reading kit |
|                   | control  | 17  | 7.22±4.96   | /           | /           | /           | /      |                  |                                                |
| Dalesio N.M. 2020 | severe   | 7   | 0.74±0.29   | /           | /           | /           | /      | blood            | /                                              |
|                   | control  | 18  | 0.59±0.2    | /           | /           | /           | /      |                  |                                                |
| Huang Y.S. 2020   | mixed    | 55  | 1.59±1.58   | 15.71±22.60 | 7.67±2.64   | 16.83±4.03  | 36/19  | serum            | ELISA                                          |
|                   | control  | 32  | 1.10±0.92   | 0.46±0.28   | 7.02±0.65   | 17.44±3.08  | 21/11  |                  |                                                |
| Tang T. 2019      | mixed    | 120 | 63.60±8.29  | 39.00±18.38 | 48.88±9.76  | 26.86±3.12  | 96/24  | serum            | ELISA                                          |
|                   | mild     | 9   | 52.86±5.47  | 10.63±4.00  | 50.33±10.26 | 25.76±1.45  | /      |                  |                                                |
|                   | moderate | 33  | 60.16±7.08  | 23.59±3.77  | 48.82±8.58  | 27.71±3.34  | /      |                  |                                                |
|                   | severe   | 78  | 66.29±7.62  | 48.78±14.81 | 48.73±10.51 | 27.66±3.14  | /      |                  |                                                |
|                   | control  | 127 | 59.16±12.27 | 3.31±1.09   | 47.37±9.12  | 22.46±3.29  | 100/27 |                  |                                                |
| Kong Y. 2018      | mixed    | 50  | 61.59±9.76  | 37.34±19.02 | 54.34±14.38 | 26.86±3.12  | 34/16  | serum            | ELISA                                          |
|                   | mild     | 10  | 46.20±6.09  | 10.14±2.95  | 59.60±15.13 | 27.04±2.58  | /      |                  |                                                |
|                   | moderate | 15  | 58.34±7.09  | 22.88±3.93  | 56.73±15.93 | 26.81±3.80  | /      |                  |                                                |
|                   | severe   | 25  | 64.76±9.05  | 49.11±14.96 | 52.27±13.54 | 27.28±3.16  | /      |                  |                                                |
|                   | control  | 40  | 54.46±9.43  | 3.31±1.09   | 50.42±8.35  | 22.26±3.54  | 31/9   |                  |                                                |
| Bozic J. 2018     | moderate | 25  | 2.62±0.71   | 21.69±3.92  | 53.92±10.75 | 28.42±2.57  | 25/0   | plasma           | ELISA                                          |
|                   | severe   | 25  | 3.58±1.55   | 48.26±18.10 | 52.04±13.11 | 29.30±2.74  | 25/0   |                  |                                                |
|                   | control  | 25  | 1.26±0.69   | /           | 52.52±10.18 | 27.78±2.23  | 25/0   |                  |                                                |
| Lu D. 2018        | mixed    | 35  | 58.49±8.03  | /           | 48.63±1.80  | 28.21±0.51  | /      | serum            | ELISA                                          |
|                   | control  | 22  | 9.11±10.13  | /           | 49.04±2.27  | 26.013±0.65 | /      |                  |                                                |
|                   | mild     | 201 | 10.5±0.9    | 10±0.4      | 49±12.3     | 27±0.2      | 91/110 | blood            | /                                              |

|                     |                 |     |            |             |              |            |        |        |                                |
|---------------------|-----------------|-----|------------|-------------|--------------|------------|--------|--------|--------------------------------|
| Mônico-Neto M. 2018 | moderate        | 123 | 11±0.9     | 21±0.7      | 55±12.4      | 22±0.2     | 69/54  |        |                                |
|                     | severe          | 123 | 10.1±0.8   | 45±1.3      | 58±13.4      | 28±0.2     | 70/53  |        |                                |
|                     | control         | 211 | 9.1±0.9    | 3±0.3       | 42±10.4      | 26±0.2     | 61/150 |        |                                |
| Shalitin S. 2018    | mixed           | 9   | 4.56±2.92  | /           | /            | /          | /      | plasma | ELISA                          |
|                     | control         | 29  | 2.83±1.54  | /           | /            | /          | /      |        |                                |
| Smith D.F. 2017     | mild            | 23  | 76.9±114.9 | 3.5±1.1     | 9.6±2.5      | 20.7±4.6   | 8/15   | plasma | human multiplex cytokine assay |
|                     | moderate-severe | 42  | 29.2±62.0  | 15.2±11.7   | 9.0±2.7      | 23.4±13.5  | 18/24  |        |                                |
|                     | control         | 90  | 24.6±51.9  | 0.4±0.3     | 9.7±2.5      | 19.4±4.4   | 41/49  |        |                                |
| Zhang Z. 2017       | mixed           | 50  | 3.75±0.19  | /           | 79.38 months | /          | 40/10  | serum  | flow cytometry                 |
|                     | control         | 52  | 2.54±0.17  | /           | 77.13 months | /          | 33/19  |        |                                |
| Huang Y.S. 2016     | mixed           | 47  | 1.66±0.23  | 9.13±1.67   | 7.84±0.56    | 16.95±0.47 | 30/17  | serum  | ELISA                          |
|                     | control         | 32  | 1.10±0.18  | 0.37±0.06   | 7.02±0.65    | 16.55±0.58 | 21/11  |        |                                |
| Dogan D. 2016       | mixed           | 39  | 2.02±1.19  | /           | 40.7±10.75   | 29.26±4.12 | 39/0   | plasma | ELISA                          |
|                     | mild-moderate   | 12  | 1.21±0.41  | /           | 36.9±6.5     | 29.46±4.73 | 12/0   |        |                                |
|                     | severe          | 27  | 2.38±1.25  | /           | 42.4±11.8    | 29.18±3.92 | 27/0   |        |                                |
|                     | control         | 12  | 1.01±0.19  | /           | 40.0±11.7    | 27.29±2.93 | 12/0   |        |                                |
| Ifergane G. 2016    | mixed           | 21  | 6.64±5.27  | /           | 66.0±9.9     | 29.6±4.3   | 8/13   | serum  | ELISA                          |
|                     | control         | 22  | 3.14±2.05  | /           | 66.1±13.1    | 26.8±4.3   | 5/17   |        |                                |
| Nizam N. 2016       | mild-moderate   | 17  | 18.1±13.1  | 17.24±7.90  | 49.88±11.47  | 31.85±5.32 | 9/8    | saliva | ELISA                          |
|                     | severe          | 22  | 16.6±12.3  | 67.49±30.39 | 45.36±9.81   | 34.18±7.24 | 18/4   |        |                                |
|                     | control         | 13  | 8.5±2.5    | 2.64±1.82   | 43.23±9.08   | 31.71±4.56 | 5/8    |        |                                |
|                     | mild-moderate   | 17  | 99.1±42.5  | 17.24±7.90  | 49.88±11.47  | 31.85±5.32 | 9/8    | serum  | ELISA                          |
|                     | severe          | 22  | 99.2±41.1  | 67.49±30.39 | 45.36±9.81   | 34.18±7.24 | 18/4   |        |                                |
|                     | control         | 13  | 82.4±27.2  | 2.64±1.82   | 43.23±9.08   | 31.71±4.56 | 5/8    |        |                                |

|                          |                 |     |           |             |             |            |       |        |                          |
|--------------------------|-----------------|-----|-----------|-------------|-------------|------------|-------|--------|--------------------------|
| Zychowski K.E. 2016      | severe          | 8   | 2.23±0.04 | 60.1±22.3   | 44.3±6.8    | 30.5±2.6   | 8/0   | serum  | electrochemiluminescence |
|                          | control         | 7   | 2.15±0.05 | 2.6±1.8     | 40.1±7.9    | 27.4±2.5   | 7/0   |        |                          |
| Damiani M.F. 2015        | moderate-severe | 30  | 3.14±1.27 | 43.14±14.04 | 53.46±9.96  | 29.10±2.62 | 26/4  | plasma | ELISA                    |
|                          | control         | 30  | 1.46±0.69 | 2.12±1.21   | 52.70±10.66 | 28.37±2.80 | 24/6  |        |                          |
| Nobili Y. 2015           | mixed           | 52  | 11.5±5.9  | 4.99±3.07   | 11.3±2.1    | 28.3±4.9   | 27/25 | serum  | ELISA                    |
|                          | mild            | 29  | 11.8±6.4  | 2.15±1.21   | 11.4±1.9    | 28.4±5.1   | 15/14 |        |                          |
|                          | severe          | 23  | 10.5±4.3  | 8.77±3.05   | 11.2±2.5    | 28.5±5.0   | 12/11 |        |                          |
|                          | control         | 28  | 11.0±5.6  | 0.58±0.30   | 11.7±1.9    | 26.4±5.9   | 18/10 |        |                          |
| Ciccione M.M. 2014       | mild            | 26  | 1.89±0.88 | 10.55±3.14  | 53.65±11.47 | 28.13±3.04 | 23/3  | plasma | ELISA                    |
|                          | moderate-severe | 54  | 3.33±1.35 | 45.13±16.08 | 52.33±10.19 | 28.8±3.03  | 45/9  |        |                          |
| Gileles-Hillel Alex 2014 | mixed           | 75  | 8±4.8     | 9±14.2      | 10.4±2.8    | 28±4.6     | 39/36 | plasma | ELISA                    |
|                          | control         | 129 | 7.3±3.2   | 0.6±0.6     | 11±2.4      | 27.9±4.1   | 72/57 |        |                          |
| Akinnusi M. 2013         | moderate-severe | 25  | 1.71±0.99 | /           | /           | /          | 25/0  | MNC#   | ELISA                    |
|                          | control         | 18  | 1.36±0.92 | 1.9±1.6     | 52.3±9.3    | 29.5±5.1   | 18/0  |        |                          |
| Kurt O.K. 2013           | mixed           | 48  | 1.35±0.32 | /           | 48.3±12.3   | /          | 36/12 | serum  | ELISA                    |
|                          | control         | 37  | 1.31±0.30 | /           | 43.1±14.1   | /          | 22/15 |        |                          |
| Yang D. 2013             | mixed           | 25  | 1.89±1.29 | 24±17       | 54±7        | 27.39±2.91 | 23/2  | plasma | ELISA                    |
|                          | control         | 25  | 1.0±0.12  | 3±1         | 53±7        | 26.27±1.9  | 23/2  |        |                          |
| Medeiros C. A. M. 2012   | mild-moderate   | 15  | 4.4±4.5   | /           | 62.62±9.0   | 24.50±3.8  | 11/4  | serum  | ELISA                    |
|                          | severe          | 35  | 9.4±13.2  | /           | 65.0±7.2    | 25.9±4.1   | 20/15 |        |                          |
|                          | control         | 15  | 0.77±2.53 | /           | 62.50±8.4   | 25.81±4.04 | 6/9   |        |                          |
| Deboer M.D. 2012         | mixed           | 9   | 1.69±1.10 | 13.5±11.9   | 14.2±1.66   | /          | 4/5   | serum  | ELISA                    |

|                       |                 |    |             |             |             |            |       |        |       |
|-----------------------|-----------------|----|-------------|-------------|-------------|------------|-------|--------|-------|
|                       | control         | 15 | 1.61±1.27   | 0.78±0.86   | 14.6±1.72   | /          | 10/5  |        |       |
| Qian X. 2012          | severe          | 30 | 89.56±36.19 | /           | 45.0±9.0    | 29.4±2.1   | 30/0  | serum  | ELISA |
|                       | control         | 40 | 88.85±41.48 | /           | 46.3±8.1    | 24.1±2.3   | 40/0  |        |       |
| Ye J. 2012            | mixed           | 44 | 55.09±17.02 | 40.41±20.68 | 46.43±18.22 | 28.15±5.34 | 44/0  | plasma | ELISA |
|                       | mild-moderate   | 23 | 56.20±22.41 | 23.12±6.93  | 44.90±20.64 | 28.55±6.29 | 23/0  |        |       |
|                       | severe          | 21 | 53.75±19.52 | 59.33±12.59 | 48.07±11.28 | 27.82±5.01 | 21/0  |        |       |
|                       | control         | 20 | 42.56±21.15 | 2.26±1.30   | 45.80±23.01 | 26.90±4.25 | 20/0  |        |       |
| Liu Z 2011            | moderate-severe | 20 | 1.62±0.43   | 48.8±10.2   | 41.2±5.2    | 28.3±2.8   | 11/9  | serum  | ELISA |
|                       | control         | 20 | 0.92±0.34   | /           | 43.5±8.3    | 26.1±2.4   | 10/10 |        |       |
| Kim J. 2010           | moderate        | 9  | 2.87±2.53   | 14.40±4.07  | 38±15.04    | 24.43±2.45 | /     | plasma | ELISA |
|                       | severe          | 28 | 3.57±2.74   | 52.71±22.23 | 42±10.77    | 28.69±4.05 | /     |        |       |
|                       | control         | 22 | 3.02±2.44   | 1.25±1.25   | 26±6.91     | 23.88±2.30 | /     |        |       |
| Sahlman J. 2010       | mild            | 84 | 2.36±1.90   | 9.6±2.9     | 50.4±9.3    | 32.5±3.3   | 64/20 | plasma | ELISA |
|                       | control         | 40 | 2.14±2.01   | 1.9±1.4     | 45.6±11.5   | 31.5±3.5   | 25/15 |        |       |
| Steiroopoulos P. 2010 | mixed           | 38 | 2.73±1.14   | 61±27       | 45.5±10.5   | 36.4±7.4   | 33/5  | serum  | ELISA |
|                       | control         | 23 | 2.36±1.41   | 5.3±3.2     | 43.7±6.7    | 34.5±3.7   | 17/6  |        |       |
| Ye L. 2010            | mild            | 43 | 64.2±4.2    | 10.8±4.3    | 45±12       | 26.2±3.0   | 32/11 | serum  | ELISA |
|                       | moderate        | 39 | 121.2±9.9   | 29.5±5.2    | 47±10       | 26.6±4.8   | 31/8  |        |       |
|                       | severe          | 45 | 144.5±10.9  | 67.1±14.3   | 44±12       | 26.2±3.1   | 39/6  |        |       |
|                       | control         | 52 | 53.6±3.5    | 2.0±1.4     | 45±10       | 26.0±3.2   | 37/15 |        |       |
| Li Y. 2009            | mild            | 22 | 8.4±1.2     | 14.1±3.5    | 48±12       | 25.7±4.2   | 15/7  | EBC    | ELISA |
|                       | moderate        | 22 | 13.9±1.9    | 29.7±5.5    | 44±13       | 28.8±5.3   | 18/4  |        |       |
|                       | severe          | 24 | 15.5±1.8    | 70.1±18.1   | 44±8        | 28.67±4.2  | 17/7  |        |       |
|                       | control         | 22 | 6.8±1.5     | 2.9±1.3     | 43±93       | 23.3±2.0   | 14/8  |        |       |
|                       | mild            | 22 | 55.2±9.6    | 14.1±3.5    | 48±12       | 25.7±4.2   | 15/7  | serum  | ELISA |

|                        |                 |     |              |             |            |           |       |        |                                     |
|------------------------|-----------------|-----|--------------|-------------|------------|-----------|-------|--------|-------------------------------------|
|                        | moderate        | 22  | 73.5±8.9     | 29.7±5.5    | 44±13      | 28.8±5.3  | 18/4  |        |                                     |
|                        | severe          | 24  | 83.4±6.4     | 70.1±18.1   | 44±8       | 28.67±4.2 | 17/7  |        |                                     |
|                        | control         | 22  | 37.5±10.9    | 2.9±1.3     | 43±93      | 23.3±2.0  | 14/8  |        |                                     |
| Constantinidis J. 2008 | mixed           | 13  | 0.84±0.08    | 3.4±0.3     | /          | 33.4±1.5  | 13/0  | serum  | ELISA                               |
|                        | control         | 12  | 0.42±0.08    | 23.6±3.5    | /          | 27.4±0.8  | /     |        |                                     |
| Antonopoulou S. 2008   | mixed           | 45  | 0.53±0.3     | 39±25       | 52±12      | 33.5±7    | 37/8  | EBC    | ELISA                               |
|                        | control         | 25  | 0.21±0.2     | <5          | 51±7       | 31±3      | 18/7  |        |                                     |
| Arias M.A. 2008        | mixed           | 30  | 4.2±3.4      | 43.8±27.0   | 52±13      | 30.5±4.0  | 30/0  | plasma | ELISA                               |
|                        | control         | 15  | 3.6±1.8      | 3.7±3.3     | 48±10      | 28.7±4.7  | 15/0  |        |                                     |
| Li Y. 2008             | mixed           | 28  | 11.1±3.3     | 31.4±28.6   | /          | /         | /     | EBC    | ELISA                               |
|                        | control         | 22  | 6.8±1.5      | 2.9±1.3     | 43±9       | 23.3±2.0  | 14/8  |        |                                     |
|                        | mixed           | 28  | 65.3±15.4    | 31.4±28.6   | /          | /         | /     | serum  | ELISA                               |
|                        | control         | 22  | 37.5±10.9    | 2.9±1.3     | 43±9       | 23.3±2.0  | 14/8  |        |                                     |
| Nakra N. 2008          | mixed           | 24  | 3.9±4.3      | /           | /          | /         | /     |        |                                     |
|                        | control         | 9   | 3.0±2.4      | 0.97 ± 0.44 | 12.3 ± 3.4 | /         | 5/4   |        |                                     |
| Takahashi K.I. 2008    | mixed           | 41  | 1.56±2.49    | /           | 49.8±10.0  | 29.4±4.2  | 38/3  | plasma | chemiluminescent enzyme immunoassay |
|                        | control         | 12  | 0.99±0.94    | /           | 46.7±11.2  | 25.7±4.10 | 11/1  |        |                                     |
| Tomiyama H. 2008       | mild            | 10  | 1.6±0.8      | 11±3        | 49±14      | 25.1±4.5  | 10/0  | plasma | ELISA                               |
|                        | moderate        | 12  | 1.9±1.4      | 24±5        | 52±17      | 25.0±2.0  | 12/0  |        |                                     |
|                        | severe          | 28  | 2.4±1.6      | 62±22       | 52±11      | 28.3±4.3  | 28/0  |        |                                     |
|                        | control         | 15  | 1.5±0.6      | /           | 53±10      | 24.3±2.5  | 15/0  |        |                                     |
| Chen J. 2007           | mixed           | 100 | 143.12±33.52 | /           | /          | /         | 67/33 | serum  | ELISA                               |
|                        | control         | 40  | 107.43±27.66 | /           | /          | /         | /     |        |                                     |
| Tauman R. 2007         | mild            | 40  | 1.63±1.67    | 2.4±1.1     | 8.7±3.1    | /         | 22/18 | plasma | ELISA                               |
|                        | moderate-severe | 38  | 2.26±2.7     | 17.3±11.4   | 8.2±3.0    | /         | 21/17 |        |                                     |

|                   |         |    |               |             |           |            |       |                                          |       |
|-------------------|---------|----|---------------|-------------|-----------|------------|-------|------------------------------------------|-------|
|                   | control | 33 | 1.12±0.70     | 0.19±0.25   | 7.5±1.9   | /          | 17/16 |                                          |       |
| Ciftci T. U. 2004 | mixed   | 43 | 11.71±9.8     | 33.19±24.99 | 49.6±9.1  | 31.86±4.11 | 43/0  | serum                                    | ELISA |
|                   | control | 22 | 6.12±4.44     | 1.55±0.96   | 47.2±10.3 | 31.03±3.1  | 22/0  |                                          |       |
| Liu H. 2000       | mixed   | 22 | 50.67±4.70    | 44.02±20.97 | 47.4±13.6 | 27.58±3.28 | 15/7  | plasma                                   | ELISA |
|                   | control | 16 | 12.69±2.75    | 4.29±2.16   | 47.6±14.7 | 23.11±2.96 | 11/5  |                                          |       |
|                   | mixed   | 22 | 787.82±151.97 | 44.02±20.97 | 47.4±13.6 | 27.58±3.28 | 15/7  | peripheral blood mononuclear cell (PBMC) | ELISA |
|                   | control | 16 | 562.69±197.54 | 4.29±2.16   | 47.6±14.7 | 23.11±2.96 | 11/5  |                                          |       |
| Roytblat L. 2000  | mixed   | 11 | 5.58±0.37     | /           | 39.5±5    | 38.3±8     | 8/3   | serum                                    | ELISA |
|                   | control | 9  | 7.69±5.06     | /           | 35.5±9    | 36.6±8.2   | 0/9   |                                          |       |

**IL-8**

|                  |          |     |                 |              |              |              |         |                        |                                                |
|------------------|----------|-----|-----------------|--------------|--------------|--------------|---------|------------------------|------------------------------------------------|
| Bhatt S. P. 2021 | mixed    | 190 | 8.29 ±5.2       | ≥1           | 10.71±3.00   | 27.1±6.53    | 92/41   | serum                  | /                                              |
|                  | control  | 57  | 4.98 ±3.67      | < 1          | 11.87±2.66   | 27.4±4.88    | 21/11   |                        |                                                |
| Bilal N. 2021    | mild     | 10  | 106.83±11.56    | 9.70±2.77    | 42.70±14.25  | 30.65±6.98   | 5/5     | serum                  | ELISA                                          |
|                  | moderate | 10  | 105.66±9.22     | 20.24±4.40   | 47.00±9.63   | 30.66±7.76   | 8/2     |                        |                                                |
|                  | severe   | 10  | 126.31±11.73    | 44.01±10.07  | 43.30±7.42   | 29.93±3.71   | 7/3     |                        |                                                |
|                  | control  | 30  | 100.12±5.13     | 2.62±1.34    | 42.53±9.81   | 29.09±4.52   | 14/16   |                        |                                                |
| Cheng J. 2021    | mixed    | 29  | 43.50 ± 7.22    | /            | 42.3 ± 10.9  | 27.2 ± 2.8   | 18      |                        |                                                |
|                  | control  | 22  | 45.65 ± 6.87    | /            | 43.3 ± 9.5   | 24.3 ± 2.1   | 15      |                        |                                                |
| Chen V.G. 2020   | mixed    | 17  | 1088.77±1012.05 | /            | /            | /            | /       | palatine tonsils       | Milliplex-Human Cytokine/Chemokine reading kit |
|                  | control  | 17  | 664.44±565.13   | /            | /            | /            | /       |                        |                                                |
| Ming H. 2019     | mixed    | 684 | 34.6±7.1        | 31.15±9.12   | /            | /            | 446/238 | serum                  | ELISA                                          |
|                  | control  | 192 | 19.4±8.5        | 4.34±2.01    | /            | /            | 128/64  |                        |                                                |
| Zhang D. 2019    | mixed    | 21  | 229.71±175.61   | /            | /            | /            | 21/0    | sample of nasal lavage | ELISA                                          |
|                  | control  | 10  | 69.40±26.70     | /            | /            | /            | 10/0    |                        |                                                |
| Jin F. 2017      | mixed    | 100 | 40.72±1.60      | 38.011±8.040 | 55.284±7.128 | 26.746±3.500 | 82/18   | plasma                 | ELISA                                          |



|                         |                 |    |             |             |              |              |       |          |                                |
|-------------------------|-----------------|----|-------------|-------------|--------------|--------------|-------|----------|--------------------------------|
|                         | control         | 50 | 13.28±3.15  | 3.623±1.537 | 56.131±6.210 | 25.196±2.449 | 37/13 |          |                                |
| Said E.A. 2017          | severe          | 22 | 75.2±32.9   | /           | 40.4±8.6     | /            | 18/4  | plasma   | CBA                            |
|                         | control         | 21 | 91.5±43.5   | /           | 33.9±6.7     | /            | 17/4  |          |                                |
| Smith D.F. 2017         | mild            | 23 | 24.9 ± 31.4 | 3.5±1.1     | 9.6±2.5      | 20.7±4.6     | 8/15  | plasma   | human multiplex cytokine assay |
|                         | moderate-severe | 42 | 11.6 ± 16.7 | 15.2±11.7   | 9.0±2.7      | 23.4±13.5    | 18/24 |          |                                |
|                         | control         | 90 | 9.8 ± 18.8  | 0.4±0.3     | 9.7±2.5      | 19.4±4.4     | 41/49 |          |                                |
| Archontogeorgis K. 2016 | mixed           | 64 | 31.79±20.09 | /           | 51.78±11.55  | 36.34±13.18  | 52/12 | serum    | ELISA                          |
|                         | control         | 20 | 34.09±14.37 | /           | 51.40±16.24  | 33.73±5.68   | 16/4  |          |                                |
| Akinnusi M. 2013        | moderate-severe | 25 | 4.98±1.67   | /           | /            | /            | 25/0  | monocyte | ELISA                          |
|                         | control         | 18 | 4.57±1.453  | 1.9±1.6     | 52.3±9.3     | 29.5±5.1     | 18/0  |          |                                |
| Kim J. 2010             | moderate        | 9  | 11.90±2.65  | 14.40±4.07  | 38±15.04     | 24.43±2.45   | /     | plasma   | ELISA                          |
|                         | severe          | 28 | 13.35±5.63  | 52.71±22.23 | 42±10.77     | 28.69±4.05   | /     |          |                                |
|                         | control         | 22 | 12.89±4.30  | 1.25±1.25   | 26±6.91      | 23.88±2.30   | /     |          |                                |
| Bao H.R. 2005           | mixed           | 35 | 35.95±10.63 | /           | 50±10        | 29.24±3.24   | 31/4  | serum    | ELISA                          |
|                         | control         | 25 | 22.27±7.62  | /           | 50±12        | 28.04±2.27   | 22/3  |          |                                |

#### IL-10

|                   |         |     |             |             |            |            |       |                  |                                                |
|-------------------|---------|-----|-------------|-------------|------------|------------|-------|------------------|------------------------------------------------|
| Bhatt S. P. 2021  | mixed   | 190 | 2.62±0.39   | ≥1          | 10.71±3.00 | 27.1±6.53  | 92/41 | serum            | /                                              |
|                   | control | 57  | 2.10±0.28   | < 1         | 11.87±2.66 | 27.4±4.88  | 21/11 |                  |                                                |
| Chen V.G. 2020    | mixed   | 17  | 13.08±11.77 | /           | /          | /          | /     | palatine tonsils | Milliplex-Human Cytokine/Chemokine reading kit |
|                   | control | 17  | 10.69±12.95 | /           | /          | /          | /     |                  |                                                |
| Dalesio N.M. 2020 | severe  | 7   | 0.59±0.17   | /           | /          | /          | /     | blood            | /                                              |
|                   | control | 18  | 0.46±0.16   | /           | /          | /          | /     |                  |                                                |
| Huang Y.S. 2020   | mixed   | 55  | 2.74±2.94   | 15.71±22.60 | 7.67±2.64  | 16.83±4.03 | 36/19 | serum            | ELISA                                          |
|                   | control | 32  | 2.10±1.41   | 0.46±0.28   | 7.02±0.65  | 17.44±3.08 | 21/11 |                  |                                                |

|                       |                 |    |              |              |              |            |       |          |                |
|-----------------------|-----------------|----|--------------|--------------|--------------|------------|-------|----------|----------------|
| Rogers V.E. 2018      | mixed           | 20 | 1.70±1.06    | 13.1±9.8     | /            | /          | /     | serum    | ELISA          |
|                       | control         | 7  | 2.03±1.76    | 0.8±0.3      | /            | /          | /     |          |                |
| Said E.A. 2017        | severe          | 22 | 0.5±0.3      | /            | 40.4±8.6     | /          | 18/4  | plasma   | CBA            |
|                       | control         | 21 | 1.8±5.9      | /            | 33.9±6.7     | /          | 17/4  |          |                |
| Su M. 2017            | mixed           | 42 | 261.71±18.55 | 8.68±4.56    | /            | /          | /     | plasma   | ELISA          |
|                       | control         | 48 | 338.24±25.20 | 2.40±2.75    | /            | /          | /     |          |                |
| Zhang Z. 2017         | mixed           | 50 | 3.45±0.19    | /            | 79.38 months | /          | 40/10 | serum    | flow cytometry |
|                       | control         | 52 | 3.01±0.17    | /            | 77.13 months | /          | 33/19 |          |                |
| Huang Y.S. 2016       | mixed           | 47 | 2.62±0.39    | 9.13±1.67    | 7.84±0.56    | 16.95±0.47 | 30/17 | serum    | ELISA          |
|                       | control         | 32 | 2.10±0.28    | 0.37±0.06    | 7.02±0.65    | 16.55±0.58 | 21/11 |          |                |
| Leon-Cabrera S. 2015  | mixed           | 29 | 74.40±17.0   | 51.4±25.7    | 37.2±11.4    | 45.2±8.4   | 4/25  | serum    | ELISA          |
|                       | control         | 13 | 97.2±10.9    | 7.25±3.4     | 33.5±10.9    | 45.4±8.2   | 2/11  |          |                |
| Sarinc Ulasli S. 2015 | mixed           | 28 | 34.7±12.4    | 21.2(5.5–73) | 53.7±12.7    | 32.6±4.4   | 19/9  | serum    | ELISA          |
|                       | control         | 20 | 32.5±14      | 2.2(0.5–4.2) | 45.3±14      | 30.4±8     | 12/8  |          |                |
| Akinnusi M. 2013      | moderate-severe | 25 | 0.96±0.48    | /            | /            | /          | 25/0  | monocyte | ELISA          |
|                       | control         | 18 | 0.89±0.43    | 1.9±1.6      | 52.3±9.3     | 29.5±5.1   | 18/0  |          |                |
| Ye J. 2012            | mixed           | 44 | 47.84±10.72  | 40.41±20.68  | 46.43±18.22  | 28.15±5.34 | 44/0  | plasma   | ELISA          |
|                       | mild-moderate   | 23 | 46.79±11.69  | 23.12±6.93   | 44.90±20.64  | 28.55±6.29 | 23/0  |          |                |
|                       | severe          | 21 | 49.06±8.51   | 59.33±12.59  | 48.07±11.28  | 27.82±5.01 | 21/0  |          |                |
|                       | control         | 20 | 52.17±23.18  | 2.26±1.30    | 45.80±23.01  | 26.90±4.25 | 20/0  |          |                |
| Sahlman J. 2010       | mild            | 84 | 1.28±2.34    | 9.6±2.9      | 50.4±9.3     | 32.5±3.3   | 64/20 | plasma   | ELISA          |
|                       | control         | 40 | 0.70±1.51    | 1.9±1.4      | 45.6±11.5    | 31.5±3.5   | 25/15 |          |                |
| Li Y. 2009            | mild            | 22 | 46.7±4.6     | 14.1±3.5     | 48±12        | 25.7±4.2   | 15/7  | serum    | ELISA          |
|                       | moderate        | 22 | 35.7±5.3     | 29.7±5.5     | 44±13        | 28.8±5.3   | 18/4  |          |                |
|                       | severe          | 24 | 24.6±5.1     | 70.1±18.1    | 44±8         | 28.67±4.2  | 17/7  |          |                |
|                       | control         | 22 | 50.1±6.9     | 2.9±1.3      | 43±93        | 23.3±2.0   | 14/8  |          |                |

|               |         |    |            |           |       |            |      |       |       |
|---------------|---------|----|------------|-----------|-------|------------|------|-------|-------|
| Li Y. 2008    | mixed   | 28 | 38.3±13.6  | 31.4±28.6 | /     | /          | /    | EBC   | ELISA |
|               | control | 22 | 56.8±6.8   | 2.9±1.3   | 43±9  | 23.3±2.0   | 14/8 |       |       |
|               | mixed   | 28 | 37.5±12.4  | 31.4±28.6 | /     | /          | /    | serum | ELISA |
|               | control | 22 | 50.1±6.9   | 2.9±1.3   | 43±9  | 23.3±2.0   | 14/8 |       |       |
| Bao H.R. 2005 | mixed   | 35 | 36.39±4.96 | /         | 50±10 | 29.24±3.24 | 31/4 | serum | ELISA |
|               | control | 25 | 42.06±4.09 | /         | 50±12 | 28.04±2.27 | 22/3 |       |       |

**IL-2**

|                       |         |    |            |               |              |            |       |        |                |
|-----------------------|---------|----|------------|---------------|--------------|------------|-------|--------|----------------|
| Shi C. 2019           | mixed   | 15 | 59.98±8.57 | 33.30±21.68   | 44.46±12.56  | 27.00±2.21 | 12/3  | sputum | ELISA          |
|                       | control | 15 | 36.58±6.20 | 2.07±0.83     | 41.33±9.44   | 24.65±1.86 | 11/4  |        |                |
| Said E.A. 2017        | severe  | 22 | 0.3±0.2    | /             | 40.4±8.6     | /          | 18/4  | plasma | CBA            |
|                       | control | 21 | 1.1±3.3    | /             | 33.9±6.7     | /          | 17/4  |        |                |
| Zhang Z. 2017         | mixed   | 50 | 3.41±0.21  | /             | 79.38 months | /          | 40/10 | serum  | flow cytometry |
|                       | control | 52 | 3.38±0.19  | /             | 77.13 months | /          | 33/19 |        |                |
| Sarinc Ulasli S. 2015 | mixed   | 28 | 101.4±9.4  | 21.2 (5.5–73) | 53.7±12.7    | 32.6±4.4   | 19/9  | serum  | ELISA          |
|                       | control | 20 | 97.2±10.2  | 2.2 (0.5–4.2) | 45.3±14      | 30.4±8     | 12/8  |        |                |

**IL-4**

|                |         |    |               |               |              |                          |       |                  |                                                |
|----------------|---------|----|---------------|---------------|--------------|--------------------------|-------|------------------|------------------------------------------------|
| Chen V.G. 2020 | mixed   | 17 | 6.67±2.37     | /             | /            | /                        | /     | palatine tonsils | Milliplex-Human Cytokine/Chemokine reading kit |
|                | control | 17 | 6.49±3.29     | /             | /            | /                        | /     |                  |                                                |
| Said E.A. 2017 | severe  | 22 | 1.2±0.6       | /             | 40.4±8.6     | /                        | 18/4  | plasma           | Cytometric beads array (CBA)                   |
|                | control | 21 | 5.6±20.4      | /             | 33.9±6.7     | /                        | 17/4  |                  |                                                |
| Su M. 2017     | mixed   | 42 | 234.24±12.16  | 8.68±4.56     | /            | /                        | /     | plasma           | ELISA                                          |
|                | control | 48 | 186.42±11.43  | 2.40±2.75     | /            | /                        | /     |                  |                                                |
| Zhang Z. 2017  | mixed   | 50 | 2.45±0.21     | /             | 79.38 months | /                        | 40/10 | serum            | flow cytometry                                 |
|                | control | 52 | 1.21±0.22     | /             | 77.13 months | /                        | 33/19 |                  |                                                |
| Ye J. 2015     | mixed   | 25 | 36.72 ± 16.58 | 34.76 ± 15.28 | 6.45±2.84    | 1.28 ± 0.64, BMI z score | 16/9  | plasma           | ELISA                                          |
|                | control | 19 | 33.24 ± 15.69 | 0.38 ± 0.20   | 6.63±2.71,   | 1.25 ± 0.47, BMI z score | 12/7  |                  |                                                |

|                  |                 |    |           |         |          |          |      |      |       |
|------------------|-----------------|----|-----------|---------|----------|----------|------|------|-------|
| Akinnusi M. 2013 | moderate-severe | 25 | 0.39±0.21 | /       | /        | /        | 25/0 | MNC# | ELISA |
|                  | control         | 18 | 0.36±0.20 | 1.9±1.6 | 52.3±9.3 | 29.5±5.1 | 18/0 |      |       |

**IL-12**

|                      |         |    |             |             |           |            |       |        |       |
|----------------------|---------|----|-------------|-------------|-----------|------------|-------|--------|-------|
| Huang Y.S. 2020      | mixed   | 55 | 1.77±1.15   | 15.71±22.60 | 7.67±2.64 | 16.83±4.03 | 36/19 | serum  | ELISA |
|                      | control | 6  | 0.97±0.75   | /           | /         | /          | /     |        |       |
| Said E.A. 2017       | severe  | 22 | 1±2.6       | /           | 40.4±8.6  | /          | 18/4  | plasma | CBA   |
|                      | control | 21 | 0±0.1       | /           | 33.9±6.7  | /          | 17/4  |        |       |
| Leon-Cabrera S. 2015 | mixed   | 29 | 405.3±57.4  | 51.4±25.7   | 37.2±11.4 | 45.2±8.4   | 4/25  | serum  | ELISA |
|                      | control | 13 | 394±64.7    | 7.25±3.4    | 33.5±10.9 | 45.4±8.2   | 2/11  |        |       |
| Rogers V.E. 2018     | mixed   | 20 | 4.88 ± 2.97 | 13.1±9.8    | /         | /          | /     | serum  | ELISA |
|                      | control | 7  | 5.37 ± 4.15 | 0.8±0.3     | /         | /          | /     |        |       |

**IL-17**

|                  |         |     |             |             |             |                          |       |        |       |
|------------------|---------|-----|-------------|-------------|-------------|--------------------------|-------|--------|-------|
| Bhatt S. P. 2021 | mixed   | 190 | 15.12±1.38  | ≥1          | 10.71±3.00  | 27.1±6.53                | 92/41 | serum  | /     |
|                  | control | 57  | 10.20±1.25  | < 1         | 11.87±2.66  | 27.4±4.88                | 21/11 |        |       |
| Huang Y.S. 2020  | mixed   | 55  | 13.78±7.18  | 15.71±22.60 | 7.67±2.64   | 16.83±4.03               | 36/19 | serum  | ELISA |
|                  | control | 32  | 10.20±6.36  | 0.46±0.28   | 7.02±0.65   | 17.44±3.08               | 21/11 |        |       |
| Toujani, S. 2017 | severe  | 92  | 20.3±3.9    | 55.7±17.8   | 52.3±12.7   | 36.2±6                   | 48/44 | serum  | ELISA |
|                  | control | 30  | 10.05±3     | /           | 45.7±14.7   | 32±4.2                   | 17/13 |        |       |
| Huang Y.S. 2016  | mixed   | 47  | 15.12±1.38  | 9.13±1.67   | 7.84±0.56   | 16.95±0.47               | 30/17 | serum  | ELISA |
|                  | control | 32  | 10.20±1.25  | 0.37±0.06   | 7.02±0.65   | 16.55±0.58               | 21/11 |        |       |
| Ye J. 2015       | mixed   | 25  | 88.36±14.96 | 34.76±15.28 | 6.45 ± 2.84 | 1.28 ± 0.64, BMI z score | 16/9  | plasma | ELISA |
|                  | control | 19  | 38.18±21.63 | 0.38±0.20   | 6.63 ± 2.71 | 1.25 ± 0.47, BMI z score | 12/7  |        |       |
| Ye J. 2012       | mixed   | 44  | 70.30±13.65 | 40.41±20.68 | 46.43±18.22 | 28.15±5.34               | 44/0  | plasma | ELISA |
|                  | control | 20  | 55.12±18.23 | 2.26±1.30   | 45.80±23.01 | 26.90±4.25               | 20/0  |        |       |

**IL-18**

|                  |               |     |               |             |             |            |        |        |       |
|------------------|---------------|-----|---------------|-------------|-------------|------------|--------|--------|-------|
| Tang T. 2019     | mixed         | 120 | 94.13±7.98    | 39.00±18.38 | 48.88±9.76  | 26.86±3.12 | 96/24  | serum  | ELISA |
|                  | mild          | 9   | 81.80±2.68    | 10.63±4.00  | 50.33±10.26 | 25.76±1.45 | /      |        |       |
|                  | moderate      | 33  | 91.24±5.34    | 23.59±3.77  | 48.82±8.58  | 27.71±3.34 | /      |        |       |
|                  | severe        | 78  | 96.77±7.63    | 48.78±14.81 | 48.73±10.51 | 27.66±3.14 | /      |        |       |
|                  | control       | 127 | 89.72±12.71   | 3.31±1.09   | 47.37±9.12  | 22.46±3.29 | 100/27 |        |       |
| Zhang S.W. 2015  | mild-moderate | 32  | 15.57±5.09    | /           | 42.31±5.31  | 24.84±1.58 | 24/8   | serum  | ELISA |
|                  | severe        | 34  | 19.26±9.87    | /           | 44.74±9.02  | 25.04±2.52 | 25/9   |        |       |
|                  | control       | 25  | 10.58±2.02    | /           | /           | /          | /      |        |       |
| Li C. 2009       | mild          | 16  | 352.08±76.32  | 11.10±3.89  | 50.03±15.03 | 28.37±4.20 | 16/0   | plasma | ELISA |
|                  | moderate      | 18  | 600.17±83.91  | 29.78±5.19  | 47.11±12.76 | 27.85±2.52 | 18/0   |        |       |
|                  | severe        | 18  | 797.64±109.83 | 64.26±17.94 | 46.37±14.46 | 28.07±3.28 | 18/0   |        |       |
|                  | control       | 18  | 250.27±76.48  | 2.41±1.66   | 48.51±16.84 | 26.96±3.22 | 18/0   |        |       |
| <b>IL-23</b>     |               |     |               |             |             |            |        |        |       |
| Bhatt S. P. 2021 | mixed         | 190 | 14.58±0.75    | ≥1          | 10.71±3.00  | 27.1±6.53  | 92/41  | serum  | /     |
|                  | control       | 57  | 12.29±0.73    | < 1         | 11.87±2.66  | 27.4±4.88  | 21/11  |        |       |
| Huang Y.S. 2020  | mixed         | 55  | 20.14±7.08    | 15.71±22.60 | 7.67±2.64   | 16.83±4.03 | 36/19  | serum  | ELISA |
|                  | control       | 32  | 12.29±3.66    | 0.46±0.28   | 7.02±0.65   | 17.44±3.08 | 21/11  |        |       |
| Can M. 2016      | severe        | 12  | 30.9±1.4      | /           | /           | /          | /      | serum  | ELISA |
|                  | control       | 27  | 6.9±1.3       | 1.6±1.2     | 49.6±11.7   | 28.8±4.6   | 21/6   |        |       |
| Huang Y.S. 2016  | mixed         | 47  | 14.58±0.75    | 9.13±1.67   | 7.84±0.56   | 16.95±0.47 | 30/17  | serum  | ELISA |
|                  | control       | 32  | 12.29±0.73    | 0.37±0.06   | 7.02±0.65   | 16.55±0.58 | 21/11  |        |       |

GCF: gingival crevicular fluid; ECLIA: electrochemiluminescence immunoassay; ELISA: enzyme-linked immunosorbent assay.

**Supplemental Table 2.** Detailed References Information in Interleukins (ILs) protein.

| Study ID           | References                                                                                                                                                                                                                                                                                                           |
|--------------------|----------------------------------------------------------------------------------------------------------------------------------------------------------------------------------------------------------------------------------------------------------------------------------------------------------------------|
| Kotsiou O. S. 2022 | 1. Kotsiou OS, Siachpazidou DI, Pastaka C, et al. Association between Interleukin-6 and vitamin D serum levels in patients with obstructive sleep apnea syndrome and impact of long-term continuous positive airway pressure therapy on biomarker levels. <i>Respiratory Physiology and Neurobiology</i> . 2022;296. |
| Bhatt S. P. 2021   | 2. Bhatt SP, Guleria R, Kabra SK. Metabolic alterations and systemic inflammation in overweight/obese children with obstructive sleep apnea. <i>PLoS ONE</i> . 2021;16(6 June).                                                                                                                                      |
| Bilal N. 2021      | 3. Bilal N, Kurutas EB, Orhan I, Bilal B, Doganer A. Evaluation of preoperative and postoperative serum interleukin-6, interleukin-8, tumor necrosis factor alpha and raftlin levels in patients with obstructive sleep apnea. <i>Sleep and Breathing</i> . 2021;25(2):819-826.                                      |
| Cheng J. 2021      | 4. Cheng J, Xie Z, Wang S, et al. Cough hypersensitivity in patients with metabolic syndrome: a clinical finding and its possible mechanisms. <i>BMC Pulmonary Medicine</i> . 2021;21(1).                                                                                                                            |
| Chen B. 2021       | 5. Chen B, Liu YN, Ji L, et al. Elevated levels of interleukin-35 and interleukin-37 in adult patients with obstructive sleep apnea. <i>Journal of Clinical Laboratory Analysis</i> . 2021;35(6).                                                                                                                    |
| Celikhisar H. 2020 | 6. Celikhisar H, Ilkhan GD. Alterations in Serum Adropin, Adiponectin, and Proinflammatory Cytokine Levels in OSAS. <i>Canadian respiratory journal</i> . 2020;2020:2571283.                                                                                                                                         |
| Chen V.G. 2020     | 7. Chen VG, Fonseca VMGD, Amaral JB, et al. Inflammatory markers in palatine tonsils of children with obstructive sleep apnea syndrome. <i>Brazilian Journal of Otorhinolaryngology</i> . 2020;86(1):23-29.                                                                                                          |
| Dalesio N.M. 2020  | 8. Dalesio NM, Lee CKK, Hendrix CW, et al. Effects of Obstructive Sleep Apnea and Obesity on Morphine Pharmacokinetics in Children. <i>Anesthesia and analgesia</i> . 2020;131(3):876-884.                                                                                                                           |
| Huang Y.S. 2020    | 9. Huang YS, Chin WC, Guillemineault C, Chu KC, Lin CH, Li HY. Inflammatory factors: Nonobese pediatric obstructive sleep apnea and adenotonsillectomy. <i>Journal of Clinical Medicine</i> . 2020;9(4).                                                                                                             |
| Ming H. 2019       | 10. Ming H, Tian A, Liu B, et al. Inflammatory cytokines tumor necrosis factor-, interleukin-8 and sleep monitoring in patients with obstructive sleep apnea syndrome. <i>Experimental and Therapeutic Medicine</i> . 2019;17(3):1766-1770.                                                                          |
| Tang T. 2019       | 11. Tang T, Huang Q, Liu J, et al. Oxidative stress does not contribute to the release of proinflammatory cytokines through activating the Nod-like receptor protein 3 inflammasome in patients with obstructive sleep apnoea. <i>Sleep and Breathing</i> . 2019;23(2):535-542.                                      |
| Shi C. 2019        | 12. Shi C, Liang S, Xu X, et al. Cough hypersensitivity in patients with obstructive sleep apnea hypopnea syndrome. <i>Sleep and Breathing</i> . 2019;23(1):33-39.                                                                                                                                                   |
| Zhang D. 2019      | 13. Zhang D, Xiao Y, Luo J, et al. Measurement of fractional exhaled nitric oxide and nasal nitric oxide in male patients with obstructive sleep apnea. <i>Sleep and Breathing</i> . 2019;23(3):785-793.                                                                                                             |
| Bozic J. 2018      | 14. Bozic J, Borovac JA, Galic T, Kurir TT, Supe-Domic D, Dogas Z. Adropin and inflammation biomarker levels in male patients with obstructive sleep apnea: A link with glucose metabolism and sleep parameters. <i>Journal of Clinical Sleep Medicine</i> . 2018;14(7):1109-1118.                                   |
| Kong Y. 2018       | 15. Kong Y, Li Z, Tang T, et al. The level of lipopolysaccharide-binding protein is elevated in adult patients with obstructive sleep apnea. <i>BMC Pulmonary Medicine</i> . 2018;18(1).                                                                                                                             |
| Lu D. 2018         | 16. Lu D, Abulimiti A, Wu T, Abudureyim A, Li N. Pulmonary surfactant-associated proteins and inflammatory factors in obstructive sleep apnea. <i>Sleep and Breathing</i> . 2018;22(1):99-107.                                                                                                                       |

|                         |                                                                                                                                                                                                                                                                                                                               |
|-------------------------|-------------------------------------------------------------------------------------------------------------------------------------------------------------------------------------------------------------------------------------------------------------------------------------------------------------------------------|
| Mônico-Neto M. 2018     | 17. Mônico-Neto M, Moreira Antunes HK, Thomatieli Dos Santos RV, et al. Physical activity as a moderator for obstructive sleep apnoea and cardiometabolic risk in the EPISONO study. <i>European Respiratory Journal</i> . 2018;52(4).                                                                                        |
| Rogers V.E. 2018        | 18. Rogers VE, Bollinger ME, Tulapurkar ME, et al. Inflammation and asthma control in children with comorbid obstructive sleep apnea. <i>Pediatric Pulmonology</i> . 2018;53(9):1200-1207.                                                                                                                                    |
| Shalitin S. 2018        | 19. Shalitin S, Deutsch V, Tauman R. Hepcidin, soluble transferrin receptor and IL-6 levels in obese children and adolescents with and without type 2 diabetes mellitus/impaired glucose tolerance and their association with obstructive sleep apnea. <i>Journal of Endocrinological Investigation</i> . 2018;41(8):969-975. |
| Gamsiz-Isik H. 2017     | 20. Gamsiz-Isik H, Kiyani E, Bingol Z, Baser U, Ademoglu E, Yalcin F. Does Obstructive Sleep Apnea Increase the Risk for Periodontal Disease? A Case-Control Study. <i>Journal of periodontology</i> . 2017;88(5):443-449.                                                                                                    |
| Jin F. 2017             | 21. Jin F, Liu J, Zhang X, et al. Effect of continuous positive airway pressure therapy on inflammatory cytokines and atherosclerosis in patients with obstructive sleep apnea syndrome. <i>Molecular Medicine Reports</i> . 2017;16(5):6334-6339.                                                                            |
| Said E.A. 2017          | 22. Said EA, Al-Abri MA, Al-Saidi I, et al. Altered blood cytokines, CD4 T cells, NK and neutrophils in patients with obstructive sleep apnea. <i>Immunology Letters</i> . 2017;190:272-278.                                                                                                                                  |
| Smith D.F. 2017         | 23. Smith DF, Hossain MM, Hura A, et al. Inflammatory milieu and cardiovascular homeostasis in children with obstructive sleep apnea. <i>Sleep</i> . 2017;40(4).                                                                                                                                                              |
| Su M. 2017              | 24. Su MS, Xu L, Xu K, Zheng JS. Association of T lymphocyte immune imbalance and IL-10 gene polymorphism with the risk of obstructive sleep apnea in children with obesity. <i>Sleep and Breathing</i> . 2017;21(4):929-937.                                                                                                 |
| Toujani S. 2017         | 25. Toujani S, Kaabachi W, Mjid M, Hamzaoui K, Cherif J, Beji M. Vitamin D deficiency and interleukin-17 relationship in severe obstructive sleep apnea-hypopnea syndrome. <i>Annals of Thoracic Medicine</i> . 2017;12(2):107-113.                                                                                           |
| Zhang Z. 2017           | 26. Zhang Z, Wang C. Immune status of children with obstructive sleep apnea/hypopnea syndrome. <i>Pakistan Journal of Medical Sciences</i> . 2017;33(1):195-199.                                                                                                                                                              |
| Archontogeorgis K. 2016 | 27. Archontogeorgis K, Nena E, Tsigalou C, et al. Cystatin C Levels in Middle-Aged Patients with Obstructive Sleep Apnea Syndrome. <i>Pulmonary Medicine</i> . 2016;2016.                                                                                                                                                     |
| Can M. 2016             | 28. Can M, Uygur F, Tanriverdi H, Acikgoz B, Alper B, Guven B. Effect of continuous positive airway pressure (CPAP) therapy on IL-23 in patients with obstructive sleep apnea. <i>Immunologic research</i> . 2016;64(5-6):1179-1184.                                                                                          |
| Dogan D. 2016           | 29. Dogan D, Ocal N, Aydogan M, Tasci C, Tapan S, Yetkin S. Roles And Relationships Of Serum Ischemia-Modified Albumin In Obstructive Sleep Apnea In Comparison With Interleukin-6. <i>American Journal of Respiratory and Critical Care Medicine</i> . 2016;193.                                                             |
| Huang Y.S. 2016         | 30. Huang YS, Guilleminault C, Hwang FM, et al. Inflammatory cytokines in pediatric obstructive sleep apnea. <i>Medicine (United States)</i> . 2016;95(41).                                                                                                                                                                   |
| Ifergane G. 2016        | 31. Ifergane G, Ovanyan A, Toledano R, et al. Obstructive Sleep Apnea in Acute Stroke: A Role for Systemic Inflammation. <i>Stroke</i> . 2016;47(5):1207-1212.                                                                                                                                                                |
| Nizam N. 2016           | 32. Nizam N, Basoglu OK, Tasbakan MS, Lappin DF, Buduneli N. Is there an association between obstructive sleep apnea syndrome and periodontal inflammation? <i>Clinical oral investigations</i> . 2016;20(4):659-668.                                                                                                         |
| Zychowski K.E. 2016     | 33. Zychowski KE, Sanchez B, Pedrosa RP, et al. Serum from obstructive sleep apnea patients induces inflammatory responses in coronary artery endothelial cells. <i>Atherosclerosis</i> . 2016;254:59-66.                                                                                                                     |
| Damiani M.F. 2015       | 34. Damiani MF, Zito A, Carratù P, et al. Obstructive Sleep Apnea, Hypertension, and Their Additive Effects on Atherosclerosis. <i>Biochem Res Int</i> . 2015;2015:984193.                                                                                                                                                    |

|                             |                                                                                                                                                                                                                                                         |
|-----------------------------|---------------------------------------------------------------------------------------------------------------------------------------------------------------------------------------------------------------------------------------------------------|
| Leon-Cabrera S.<br>2015     | 35. Leon-Cabrera S, Arana-Lechuga Y, Esqueda-León E, et al. Reduced Systemic levels of IL-10 are associated with the severity of obstructive sleep apnea and insulin resistance in morbidly obese humans. <i>Mediators of Inflammation</i> . 2015;2015. |
| Nobili Y. 2015              | 36. Nobili V, Alisi A, Cutrera R, et al. Altered gut-liver axis and hepatic adiponectin expression in OSAS: Novel mediators of liver injury in paediatric non-alcoholic fatty liver. <i>Thorax</i> . 2015;70(8):769-781.                                |
| Sarinc Ulasli S.<br>2015    | 37. Sarinc Ulasli S, Sariaydin M, Gunay E, et al. Effects of nondipping pattern on systemic inflammation in obstructive sleep apnea. <i>Sleep and Breathing</i> . 2015;19(4):1185-1190.                                                                 |
| Ye J. 2015                  | 38. Ye J, Liu H, Li P, et al. CD4 <sup>+</sup> T-lymphocyte subsets in nonobese children with obstructive sleep apnea syndrome. <i>Pediatric Research</i> . 2015;78(2):165-173.                                                                         |
| Zhang S.W.<br>2015          | 39. Zhang SW, Zhao GF, Liu YH, et al. MIF and IL - 18 serum levels in patients with OSAHS. <i>Journal of Dalian Medical University</i> . 2015;37(4):372-375.                                                                                            |
| Ciccone M.M.<br>2014        | 40. Ciccone MM, Scicchitano P, Zito A, et al. Correlation between inflammatory markers of atherosclerosis and carotid intima-media thickness in Obstructive Sleep Apnea. <i>Molecules (Basel, Switzerland)</i> . 2014;19(2):1651-1662.                  |
| Gileles-Hillel<br>Alex 2014 | 41. Gileles-Hillel A, Alonso-Álvarez ML, Kheirandish-Gozal L, et al. Inflammatory markers and obstructive sleep apnea in obese children: The NANOS study. <i>Mediators of Inflammation</i> . 2014;2014.                                                 |
| Akinnusi M.<br>2013         | 42. Akinnusi M, Jaoude P, Kufel T, El-Solh AA. Toll-like receptor activity in patients with obstructive sleep apnea. <i>Sleep and Breathing</i> . 2013;17(3):1009-1016.                                                                                 |
| Kurt O.K. 2013              | 43. Kurt OK, Tosun M, Talay F. Serum cardiotrophin-1 and IL-6 levels in patients with obstructive sleep apnea syndrome. <i>Inflammation</i> . 2013;36(6):1344-1347.                                                                                     |
| Yang D. 2013                | 44. Yang D, Liu Z, Luo Q. Plasma ghrelin and pro-inflammatory markers in patients with obstructive sleep apnea and stable coronary heart disease. <i>Medical Science Monitor</i> . 2013;19(1):251-256.                                                  |
| Deboer M.D.<br>2012         | 45. Deboer MD, Mendoza JP, Liu L, Ford G, Yu PL, Gaston BM. Increased systemic inflammation overnight correlates with insulin resistance among children evaluated for obstructive sleep apnea. <i>Sleep Breath</i> . 2012;16(2):349-354.                |
| Medeiros C. A.<br>M. 2012   | 46. Medeiros CAM, De Bruin VMS, Andrade GM, Coutinho WM, de Castro-Silva C, de Bruin PFC. Obstructive sleep apnea and biomarkers of inflammation in ischemic stroke. <i>Acta Neurologica Scandinavica</i> . 2012;126(1):17-22.                          |
| Qian X. 2012                | 47. Qian X, Yin T, Li T, et al. High levels of inflammation and insulin resistance in obstructive sleep apnea patients with hypertension. <i>Inflammation</i> . 2012;35(4):1507-1511.                                                                   |
| Ye J. 2012                  | 48. Ye J, Liu H, Zhang G, et al. The Treg/Th17 imbalance in patients with obstructive sleep apnoea syndrome. <i>Mediators of Inflammation</i> . 2012;2012.                                                                                              |
| Liu Z 2011                  | 49. Liu Z, Xu Y, Hua Q, Wang Y, Liu R, Yang Z. Additive effects of obstructive sleep apnea syndrome and hypertension on inflammatory reaction. <i>African Journal of Biotechnology</i> . 2011;10(55):11738-11744.                                       |
| Kim J. 2010                 | 50. Kim J, Lee CH, Park CS, Kim BG, Kim SW, Cho JH. Plasma levels of MCP-1 and adiponectin in obstructive sleep apnea syndrome. <i>Archives of otolaryngology--head &amp; neck surgery</i> . 2010;136(9):896 - 899.                                     |
| Sahlman J. 2010             | 51. Sahlman J, Miettinen K, Peuhkurinen K, et al. The activation of the inflammatory cytokines in overweight patients with mild obstructive sleep apnoea. <i>J Sleep Res</i> . 2010;19(2):341-348.                                                      |
| Steiropoulos P.<br>2010     | 52. Steiropoulos P, Papanas N, Nena E, et al. Inflammatory markers in middle-aged obese subjects: Does obstructive sleep apnea syndrome play a role? <i>Mediators of Inflammation</i> . 2010;2010.                                                      |



|                        |                                                                                                                                                                                                                                                                                          |
|------------------------|------------------------------------------------------------------------------------------------------------------------------------------------------------------------------------------------------------------------------------------------------------------------------------------|
| Ye L. 2010             | 53. Ye L, Ma GH, Chen L, et al. Quantification of circulating cell-free DNA in the serum of patients with obstructive sleep apnea-hypopnea syndrome. <i>Lung</i> . 2010;188(6):469-474.                                                                                                  |
| Li Y. 2009             | 54. Li Y, Chongsuvivatwong V, Geater A, Liu A. Exhaled breath condensate cytokine level as a diagnostic tool for obstructive sleep apnea syndrome. <i>Sleep medicine</i> . 2009;10(1):95-103.                                                                                            |
| Li C. 2009             | 55. Li C, Zhang XL, Liu H, Wang ZG, Yin KS. Association among plasma interleukin-18 levels, carotid intima-media thickness and severity of obstructive sleep apnea. <i>Chinese Medical Journal</i> . 2009;122(1):24-29.                                                                  |
| Antonopoulou S. 2008   | 56. Antonopoulou S, Loukides S, Papatheodorou G, Roussos C, Alchanatis M. Airway inflammation in obstructive sleep apnea: Is leptin the missing link? <i>Respiratory Medicine</i> . 2008;102(10):1399-1405.                                                                              |
| Arias M.A. 2008        | 57. Arias MA, García-Río F, Alonso-Fernández A, et al. CPAP decreases plasma levels of soluble tumour necrosis factor- $\alpha$ receptor 1 in obstructive sleep apnoea. <i>European Respiratory Journal</i> . 2008;32(4):1009-1015.                                                      |
| Constantinidis J. 2008 | 58. Constantinidis J, Erelidias S, Angouridakis N, Konstantinidis I, Vital V, Angouridaki C. Cytokine changes after surgical treatment of obstructive sleep apnoea syndrome. <i>European Archives of Oto-Rhino-Laryngology</i> . 2008;265(10):1275-1279.                                 |
| Li Y. 2008             | 59. Li Y, Chongsuvivatwong V, Geater A, Liu A. Are biomarker levels a good follow-up tool for evaluating obstructive sleep apnea syndrome treatments? <i>Respiration</i> . 2008;76(3):317-323.                                                                                           |
| Nakra N. 2008          | 60. Nakra N, Bhargava S, Dzuira J, Caprio S, Bazzy-Asaad A. Sleep-disordered breathing in children with metabolic syndrome: The role of leptin and sympathetic nervous system activity and the effect of continuous positive airway pressure. <i>Pediatrics</i> . 2008;122(3):e634-e642. |
| Takahashi K.I. 2008    | 61. Takahashi KI, Chin K, Nakamura H, et al. Plasma thioredoxin, a novel oxidative stress marker, in patients with obstructive sleep apnea before and after nasal continuous positive airway pressure. <i>Antioxidants and Redox Signaling</i> . 2008;10(4):715-726.                     |
| Tomiyama H. 2008       | 62. Tomiyama H, Okazaki R, Inoue D, et al. Link between obstructive sleep apnea and increased bone resorption in men. <i>Osteoporosis International</i> . 2008;19(8):1185-1192.                                                                                                          |
| Chen J. 2007           | 63. Chen J, Yang J, Yang WW, Wu H. Analysis of serum IL-6 and TNF- $\alpha$ levels in children with obstructive sleep apnea syndrome. <i>Chinese Journal of Evidence-Based Medicine</i> . 2007;7(7):547-549.                                                                             |
| Tauman R. 2007         | 64. Tauman R, O'Brien LM, Gozal D. Hypoxemia and obesity modulate plasma C-reactive protein and interleukin-6 levels in sleep-disordered breathing. <i>Sleep and Breathing</i> . 2007;11(2):77-84.                                                                                       |
| Bao H.R. 2005          | 65. Bao HR, Yu Q, Liu XJ, Wang XY. Changes of serum interleukin-8 and monocyte chemoattractant protein-1 levels in patients with obstructive sleep apnea hypopnea syndrome. <i>Chinese Journal of Clinical Rehabilitation</i> . 2005;9(31):71-73.                                        |
| Ciftci T. U. 2004      | 66. Ciftci TU, Kokturk O, Bukan N, Bilgihan A. The relationship between serum cytokine levels with obesity and obstructive sleep apnea syndrome. <i>Cytokine</i> . 2004;28(2):87-91.                                                                                                     |
| Liu H. 2000            | 67. Liu H, Liu J, Xiong S, Shen G, Zhang Z, Xu Y. The change of interleukin-6 and tumor necrosis factor in patients with obstructive sleep apnea syndrome. <i>Journal of Tongji Medical University = Tong ji yi ke da xue xue bao</i> . 2000;20(3):200-202.                              |
| Roytblat L. 2000       | 68. Roytblat L, Rachinsky M, Fisher A, et al. Raised interleukin-6 levels in obese patients. <i>Obesity research</i> . 2000;8(9):673-675.                                                                                                                                                |

**Supplemental Table 3.** The expression of interleukins and AHI of included studies before and after treatment in OSA.

| Study ID                  | ILs pg/ml mean±SD |              | AHI events/h  |                  |
|---------------------------|-------------------|--------------|---------------|------------------|
|                           | post              | pre          | post          | pre              |
| <b>IL-1β</b>              |                   |              |               |                  |
| Chuang H.H. 2020          | 0.3±0.2           | 0.8±0.8      | 2.4±3.1       | 11.5±13.6        |
| Huang Y.S. 2020           | 0.35±0.29         | 1.51±2.25    | 2.98±4.35     | 15.71±22.60      |
| Tirado R. 2017            | 0.46±0.47         | 0.67±0.61    | 9.14±9.71     | 33.8±26.1        |
| <b>IL-6</b>               |                   |              |               |                  |
| Bilal N. 2021             | 55.17±3.74        | 57.98±5.96   | 21.50±4.94    | 44.01±10.07      |
| Borges Y.G. 2020          | 7±4.2             | 8±3.1        | /             | /                |
| Huang Y.S. 2020           | 1.22±1.21         | 1.59±1.58    | 2.98±4.35     | 15.71±22.60      |
| Salman M.A. 2020          | 1.80±0.45         | 2.27±0.40    | 14.04±9.8     | 27.3±12.54       |
| Wang X 2020               | 18.68±1.33        | 43.31±2.93   | 3.96±0.76     | 42.86±15.08      |
| Campos-Rodriguez F. 2019  | 3.5 ± 2.6         | 3.6 ± 2.8    | 2.0 (0.7–4.1) | 35.9 (24.2–50.1) |
| Recoquillon S. 2019       | 1.3±1.2           | 1.1 ±0.5     | /             | 40.0 (34.0–51.0) |
| Tirado R. 2017            | 0.39±0.58         | 0.64±0.69    | 9.14±9.71     | 33.8±26.1        |
| Martínez-Cerón E. 2016    | 8.0±4.6           | 11.1±4.7     | /             | 35.6±23.4        |
| Arnardottir E.S. 2015     | 2.8±2.0           | 2.4±1.7      | /             | 50.8±20.3        |
| Kheirandish-Gozal L. 2015 | 7.1±4.7           | 9.2±5.4      | 4.5±5.3       | 17.1±17.8        |
| Akinnusi M. 2013          | 1.48±0.97         | 1.71±0.99    | 2.6±0.4       | 32.2±13.1        |
| Kezirian E.J. 2010        | 2.00±1.30         | 2.96±2.74    | /             | /                |
| Eun Y.G. 2010             | 2.4±3.4           | 7.6±10.4     | /             | 31.1±21.3        |
| Ye L. 2010                | 66.04±10.05       | 131.66±20.39 | /             | /                |
| Steiroopoulos P. 2009     | 2.46±1.08         | 2.71±1.27    | /             | 61.12±28.29      |
| Li A. M. 2008             | 0.2±0.3           | 0.3±0.4      | 1.4±2.0       | 28.7±27.7        |
| Li Y. 2008 (a)            | 59.9±13.2         | 75.7±12.3    | 24.7±12.7     | 45.7±24.9        |
| Li Y. 2008 (b)            | 51.6±23.8         | 71.4±15.4    | 12.9±15.6     | 38.6±19.3        |
| Li Y. 2008 (c)            | 62.2±14.2         | 76.3±1.2     | 28.8±17.1     | 32.7±18.4        |
| Dorkova Z. 2008           | 1.28±1.05         | 1.25±1.10    | /             | 64.7±23.3        |
| Takahashi K.I. 2008       | 0.634±0.619       | 1.68±2.87    | /             | 48.2±14.8        |
| Ryan S. 2006              | 4.46±16.39        | 5.13±22.65   | 7.35±5.35     | 41.60±45.06      |
| <b>IL-8</b>               |                   |              |               |                  |
| Bilal N. 2021             | 112.87±8.99       | 126.31±11.73 | 21.50±4.94    | 44.01±10.07      |
| Chuang H.H. 2020          | 4.1±2.2           | 6.4±3.6      | 2.4±3.1       | 11.5±13.6        |
| Jin F. 2017               | 35.79±1.63        | 40.72±1.60   | 26.73±4.34    | 37.80±6.70       |
| Martínez-Cerón E. 2016    | 9.7±4.0           | 10.7±3.3     | /             | 35.6±23.4        |
| Akinnusi M. 2013          | 4.73±1.56         | 4.98±1.67    | 2.6±0.4       | 32.2±13.1        |
| Li A. M. 2008             | 1.1±0.6           | 1.9±1.0      | 1.4±2.0       | 28.7±27.7        |
| Ryan S. 2006              | 4.68±1.56         | 5.48±1.53    | 7.35±5.35     | 41.60±45.06      |
| Bao H.R. 2005             | 33.73±8.07        | 38.97±9.72   | /             | /                |
| <b>IL-10</b>              |                   |              |               |                  |
| Borges Y.G. 2020          | 4±3.5             | 4 ±1.6       | /             | /                |
| Chuang H.H. 2020          | 0.4±0.2           | 1.2±2.1      | 2.4±3.1       | 11.5±13.6        |
| Huang Y.S. 2020           | 1.68±1.05         | 2.74±2.94    | 2.98±4.35     | 15.71±22.60      |

---

|                  |            |            |           |             |
|------------------|------------|------------|-----------|-------------|
| Akinnusi M. 2013 | 1.03±0.62  | 0.96±0.48  | 2.6±0.4   | 32.2±13.1   |
| Li Y. 2008 (a)   | 44.9±7.3   | 33.8±8.7   | 24.7±12.7 | 45.7±24.9   |
| Li Y. 2008 (b)   | 50.9±12.2  | 33.2±8.2   | 12.9±15.6 | 38.6±19.3   |
| Li Y. 2008 (c)   | 44.3±5.0   | 36.1±13.2  | 28.8±17.1 | 32.7±18.4   |
| Ryan S. 2006     | 1.08±0.60  | 1.31±0.49  | 7.35±5.35 | 41.60±45.06 |
| Bao H.R. 2005    | 39.39±3.78 | 33.91±4.29 | /         | /           |

---

**Supplemental Table 4.** Detailed References Information in Interleukins (ILs) treatment.

| Study ID                  | References                                                                                                                                                                                                                                                                                                 |
|---------------------------|------------------------------------------------------------------------------------------------------------------------------------------------------------------------------------------------------------------------------------------------------------------------------------------------------------|
| Bilal N. 2021             | 1. Bilal N, Kurutas EB, Orhan I, Bilal B, Doganer A. Evaluation of preoperative and postoperative serum interleukin-6, interleukin-8, tumor necrosis factor alpha and raftlin levels in patients with obstructive sleep apnea. <i>Sleep and Breathing</i> . 2021;25(2):819-826.                            |
| Salman M.A. 2020          | 2. Salman MA, Othman B, Salman AA, et al. Improvement of Obstructive Sleep Apnea-Hypopnea Syndrome in Morbidly Obese Patients Undergoing Laparoscopic Sleeve Gastrectomy: Prospective Study. <i>Bariatric Surgical Practice and Patient Care</i> . 2020;15(3):131-139.                                     |
| Huang Y.S. 2020           | 3. Huang YS, Chin WC, Guilleminault C, Chu KC, Lin CH, Li HY. Inflammatory factors: Nonobese pediatric obstructive sleep apnea and adenotonsillectomy. <i>Journal of Clinical Medicine</i> . 2020;9(4).                                                                                                    |
| Chuang H.H. 2020          | 4. Chuang HH, Huang CG, Chuang LP, et al. Relationships among and predictive values of obesity, inflammation markers, and disease severity in pediatric patients with obstructive sleep apnea before and after adenotonsillectomy. <i>Journal of Clinical Medicine</i> . 2020;9(2).                        |
| Wang X 2020               | 5. Wang X, Yue Z, Liu Z, et al. Continuous positive airway pressure effectively ameliorates arrhythmias in patients with obstructive sleep apnea-hypopnea via counteracting the inflammation. <i>American journal of otolaryngology - head and neck medicine and surgery</i> . 2020;41(6).                 |
| Borges Y.G. 2020          | 6. Borges YG, Ceia Cipriano LH, Aires R, et al. Oxidative stress and inflammatory profiles in obstructive sleep apnea: are short-term CPAP or aerobic exercise therapies effective? <i>Sleep and Breathing</i> . 2020;24(2):541-549.                                                                       |
| Recoquillon S. 2019       | 7. Recoquillon S, Pépin JL, Vielle B, et al. Effect of mandibular advancement therapy on inflammatory and metabolic biomarkers in patients with severe obstructive sleep apnoea: a randomised controlled trial. <i>Thorax</i> . 2019;74(5):496 - 499.                                                      |
| Campos-Rodriguez F. 2019  | 8. Campos-Rodriguez F, Asensio-Cruz MI, Cordero-Guevara J, et al. Effect of continuous positive airway pressure on inflammatory, antioxidant, and depression biomarkers in women with obstructive sleep apnea: a randomized controlled trial. <i>Sleep</i> . 2019;42(10).                                  |
| Tirado R. 2017            | 9. Tirado R, Masdeu MJ, Vigil L, et al. Impact of Bariatric Surgery on Heme Oxygenase-1, Inflammation, and Insulin Resistance in Morbid Obesity with Obstructive Sleep Apnea. <i>Obesity Surgery</i> . 2017;27(9):2338-2346.                                                                               |
| Jin F. 2017               | 10. Jin F, Liu J, Zhang X, et al. Effect of continuous positive airway pressure therapy on inflammatory cytokines and atherosclerosis in patients with obstructive sleep apnea syndrome. <i>Molecular Medicine Reports</i> . 2017;16(5):6334-6339.                                                         |
| Martínez-Cerón E. 2016    | 11. Martínez-Cerón E, Barquiel B, Bezos AM, et al. Effect of Continuous Positive Airway Pressure on Glycemic Control in Patients with Obstructive Sleep Apnea and Type 2 Diabetes. A Randomized Clinical Trial. <i>American journal of respiratory and critical care medicine</i> . 2016;194(4):476 - 485. |
| Kheirandish-Gozal L. 2015 | 12. Kheirandish-Gozal L, Gileles-Hillel A, Alonso-Álvarez ML, et al. Effects of adenotonsillectomy on plasma inflammatory biomarkers in obese children with                                                                                                                                                |

|                       |                                                                                                                                                                                                                                                                      |
|-----------------------|----------------------------------------------------------------------------------------------------------------------------------------------------------------------------------------------------------------------------------------------------------------------|
|                       | obstructive sleep apnea: A community-based study. <i>International Journal of Obesity</i> . 2015;39(7):1094-1100.                                                                                                                                                    |
| Arnardottir E.S. 2015 | 13. Arnardottir ES, Lim DC, Keenan BT, et al. Effects of obesity on the association between long-term sleep apnea treatment and changes in interleukin-6 levels: The Icelandic Sleep Apnea Cohort. <i>Journal of Sleep Research</i> . 2015;24(2):148-159.            |
| Akinnusi M. 2013      | 14. Akinnusi M, Jaoude P, Kufel T, El-Solh AA. Toll-like receptor activity in patients with obstructive sleep apnea. <i>Sleep and Breathing</i> . 2013;17(3):1009-1016.                                                                                              |
| Kezirian E.J. 2010    | 15. Kezirian EJ, Malhotra A, Goldberg AN, White DP. Changes in obstructive sleep apnea severity, biomarkers, and quality of life after multilevel surgery. <i>Laryngoscope</i> . 2010;120(7):1481-1488.                                                              |
| Eun Y.G. 2010         | 16. Eun YG, Kim MG, Kwon KH, Shin SY, Cho JS, Kim SW. Short-term effect of multilevel surgery on adipokines and pro-inflammatory cytokines in patients with obstructive sleep apnea. <i>Acta Oto-Laryngologica</i> . 2010;130(12):1394-1398.                         |
| Ye L. 2010            | 17. Ye L, Ma GH, Chen L, et al. Quantification of circulating cell-free DNA in the serum of patients with obstructive sleep apnea-hypopnea syndrome. <i>Lung</i> . 2010;188(6):469-474.                                                                              |
| Steiroopoulos P. 2009 | 18. Steiroopoulos P, Kotsianidis I, Nena E, et al. Long-term effect of continuous positive airway pressure therapy on inflammation markers of patients with obstructive sleep apnea syndrome. <i>Sleep</i> . 2009;32(4):537-543.                                     |
| Li A. M. 2008         | 19. Li AM, Lam HS, Chan MHM, et al. Inflammatory cytokines and childhood obstructive sleep apnoea. <i>Annals of the Academy of Medicine Singapore</i> . 2008;37(8):649-654.                                                                                          |
| Li Y. 2008            | 20. Li Y, Chongsuvivatwong V, Geater A, Liu A. Are biomarker levels a good follow-up tool for evaluating obstructive sleep apnea syndrome treatments? <i>Respiration</i> . 2008;76(3):317-323.                                                                       |
| Takahashi K.I. 2008   | 21. Takahashi KI, Chin K, Nakamura H, et al. Plasma thioredoxin, a novel oxidative stress marker, in patients with obstructive sleep apnea before and after nasal continuous positive airway pressure. <i>Antioxidants and Redox Signaling</i> . 2008;10(4):715-726. |
| Dorkova Z. 2008       | 21. Dorkova Z, Petrasova D, Molcanyiova A, Popovnakova M, Tkacova R. Effects of continuous positive airway pressure on cardiovascular risk profile in patients with severe obstructive sleep apnea and metabolic syndrome. <i>Chest</i> . 2008;134(4):686-692.       |
| Ryan S. 2006          | 23. Ryan S, Taylor CT, McNicholas WT. Predictors of elevated nuclear factor-kappaB-dependent genes in obstructive sleep apnea syndrome. <i>Am J Respir Crit Care Med</i> . 2006;174(7):824-830.                                                                      |
| Bao H.R. 2005         | 24. Bao HR, Yu Q, Liu XJ, Wang XY. Changes of serum interleukin-8 and monocyte chemoattractant protein-1 levels in patients with obstructive sleep apnea hypopnea syndrome. <i>Chinese Journal of Clinical Rehabilitation</i> . 2005;9(31):71-73.                    |

**Supplemental Table 5.** Causal effects of OSA on Interleukins (ILs) by Mendelian Randomization (MR) analysis.

| Protein      | Method          | nsnp | estimate | se       | p-value   | Q        | Q_df | Q_pvalue  | intercept | intercept_se | intercept_pvalue |
|--------------|-----------------|------|----------|----------|-----------|----------|------|-----------|-----------|--------------|------------------|
| IL-1 $\beta$ | IVW             | 6    | 0.057362 | 0.097236 | 0.5552422 | 3.456783 | 5    | 0.6299368 | NA        | NA           | NA               |
|              | MR Egger        | 6    | -0.12399 | 0.395746 | 0.7697122 | 3.233305 | 4    | 0.5195685 | 0.017119  | 0.036212     | 0.661043         |
|              | Weighted median | 6    | 0.025213 | 0.124132 | 0.8390492 | NA       | NA   | NA        | NA        | NA           | NA               |
|              | MR RAPS         | 6    | 0.058225 | 0.100417 | 0.562025  | NA       | NA   | NA        | NA        | NA           | NA               |
| IL-2         | IVW             | 6    | 0.223022 | 0.157516 | 0.1568123 | 7.913903 | 5    | 0.1610449 | NA        | NA           | NA               |
|              | MR Egger        | 6    | -0.10004 | 0.693946 | 0.8923423 | 7.482204 | 4    | 0.1124966 | 0.030505  | 0.0635       | 0.656033         |
|              | Weighted median | 6    | 0.250252 | 0.173386 | 0.1489305 | NA       | NA   | NA        | NA        | NA           | NA               |
|              | MR RAPS         | 6    | 0.230525 | 0.128855 | 0.0736115 | NA       | NA   | NA        | NA        | NA           | NA               |
| IL-4         | IVW             | 6    | 0.007965 | 0.082416 | 0.9230095 | 5.003613 | 5    | 0.4154394 | NA        | NA           | NA               |
|              | MR Egger        | 6    | 0.315915 | 0.341492 | 0.4072715 | 4.113981 | 4    | 0.3907999 | -0.02907  | 0.031254     | 0.404994         |
|              | Weighted median | 6    | 0.018458 | 0.107251 | 0.8633549 | NA       | NA   | NA        | NA        | NA           | NA               |
|              | MR RAPS         | 6    | 0.008137 | 0.084726 | 0.9234934 | NA       | NA   | NA        | NA        | NA           | NA               |
| IL-5         | IVW             | 6    | 0.267185 | 0.151621 | 0.0780374 | 7.126716 | 5    | 0.2113856 | NA        | NA           | NA               |
|              | MR Egger        | 6    | 0.855424 | 0.609602 | 0.233203  | 5.709781 | 4    | 0.2218957 | -0.05571  | 0.055919     | 0.375487         |
|              | Weighted median | 6    | 0.345087 | 0.167521 | 0.0394026 | NA       | NA   | NA        | NA        | NA           | NA               |
|              | MR RAPS         | 6    | 0.275156 | 0.131279 | 0.0360856 | NA       | NA   | NA        | NA        | NA           | NA               |
| IL-6         | IVW             | 6    | 0.114943 | 0.082175 | 0.1618869 | 2.946751 | 5    | 0.7081952 | NA        | NA           | NA               |
|              | MR Egger        | 6    | 0.217542 | 0.334886 | 0.5513675 | 2.846874 | 4    | 0.5837688 | -0.00968  | 0.030631     | 0.767781         |
|              | Weighted median | 6    | 0.14537  | 0.105171 | 0.1669029 | NA       | NA   | NA        | NA        | NA           | NA               |
|              | MR RAPS         | 6    | 0.116394 | 0.085241 | 0.1721066 | NA       | NA   | NA        | NA        | NA           | NA               |
| IL-8         | IVW             | 6    | 0.034224 | 0.124155 | 0.7828117 | 4.115647 | 5    | 0.5328888 | NA        | NA           | NA               |
|              | MR Egger        | 6    | 0.018938 | 0.50862  | 0.9720828 | 4.114657 | 4    | 0.3907111 | 0.001445  | 0.046578     | 0.976739         |
|              | Weighted median | 6    | 0.144775 | 0.159166 | 0.363042  | NA       | NA   | NA        | NA        | NA           | NA               |
|              | MR RAPS         | 6    | 0.034826 | 0.127981 | 0.7855289 | NA       | NA   | NA        | NA        | NA           | NA               |
| IL-10        | IVW             | 6    | 0.098857 | 0.084414 | 0.2415579 | 2.475217 | 5    | 0.7802227 | NA        | NA           | NA               |
|              | MR Egger        | 6    | 0.33397  | 0.344049 | 0.386663  | 1.978308 | 4    | 0.7397488 | -0.02217  | 0.031456     | 0.519743         |
|              | Weighted median | 6    | 0.099318 | 0.104476 | 0.341792  | NA       | NA   | NA        | NA        | NA           | NA               |
|              | MR RAPS         | 6    | 0.099886 | 0.087545 | 0.2538836 | NA       | NA   | NA        | NA        | NA           | NA               |
| IL-17        | IVW             | 6    | 0.071913 | 0.092955 | 0.43915   | 6.087695 | 5    | 0.2977791 | NA        | NA           | NA               |
|              | MR Egger        | 6    | 0.481763 | 0.368661 | 0.2613488 | 4.581895 | 4    | 0.332947  | -0.03865  | 0.03371      | 0.315493         |
|              | Weighted median | 6    | 0.123443 | 0.111973 | 0.270272  | NA       | NA   | NA        | NA        | NA           | NA               |
|              | MR RAPS         | 6    | 0.073814 | 0.086563 | 0.3938153 | NA       | NA   | NA        | NA        | NA           | NA               |
| IL-18        | IVW             | 6    | -0.02058 | 0.129129 | 0.8733503 | 5.575699 | 5    | 0.3497166 | NA        | NA           | NA               |
|              | MR Egger        | 6    | -0.43719 | 0.540325 | 0.4638207 | 4.813337 | 4    | 0.306992  | 0.039408  | 0.049511     | 0.470625         |
|              | Weighted median | 6    | -0.07542 | 0.162104 | 0.6417381 | NA       | NA   | NA        | NA        | NA           | NA               |
|              | MR RAPS         | 6    | -0.02109 | 0.125606 | 0.8666725 | NA       | NA   | NA        | NA        | NA           | NA               |

Causality of OSA on interleukins : causality was analyzed with OSA as exposure, interleukins as outcomes; or Causality of interleukins on OSA: interleukins

respectively as exposure and OSA as outcome. Each pair was analyzed by several MR methods. IVW: inverse variance weighted. MR RAPS: MR-Robust Adjusted Profile Score.

**Supplemental Table 6.** Verification of the causal effects of OSA on IL-6, IL-8 and IL-18 using another large-sample GWAS

| Protein | Method          | estimate | se    | p-value | Q     | Q_df | Q_pvalue | intercept | intercept_se | intercept_pvalue |
|---------|-----------------|----------|-------|---------|-------|------|----------|-----------|--------------|------------------|
| IL-6    | IVW             | 0.067    | 0.071 | 0.341   | 3.927 | 5    | 0.560    | NA        | NA           | NA               |
|         | MR Egger        | 0.571    | 0.345 | 0.173   | 1.705 | 4    | 0.790    | -0.045    | 0.030        | 0.210            |
|         | Weighted median | 0.134    | 0.090 | 0.135   | NA    | NA   | NA       | NA        | NA           | NA               |
|         | MR RAPS         | 0.068    | 0.072 | 0.345   | NA    | NA   | NA       | NA        | NA           | NA               |
| IL-8    | IVW             | -0.069   | 0.067 | 0.297   | 5.172 | 5    | 0.395    | NA        | NA           | NA               |
|         | MR Egger        | 0.205    | 0.341 | 0.579   | 4.424 | 4    | 0.352    | -0.025    | 0.030        | 0.457            |
|         | Weighted median | 0.012    | 0.086 | 0.887   | NA    | NA   | NA       | NA        | NA           | NA               |
|         | MR RAPS         | -0.071   | 0.067 | 0.289   | NA    | NA   | NA       | NA        | NA           | NA               |
| IL-18   | IVW             | -0.043   | 0.061 | 0.488   | 0.413 | 5    | 0.995    | NA        | NA           | NA               |
|         | MR Egger        | -0.116   | 0.341 | 0.72    | 0.35  | 4    | 0.986    | 0.007     | 0.026        | 0.815            |
|         | Weighted median | -0.040   | 0.072 | 0.579   | NA    | NA   | NA       | NA        | NA           | NA               |
|         | MR RAPS         | -0.042   | 0.063 | 0.503   | NA    | NA   | NA       | NA        | NA           | NA               |

Causality of OSA on interleukins : causality was analyzed with OSA as exposure, interleukins as outcomes; or Causality of interleukins on OSA: interleukins respectively as exposure and OSA as outcome. Each pair was analyzed by several MR methods. IVW: inverse variance weighted. MR RAPS: MR-Robust Adjusted Profile Score.



**Supplemental Table 7.** Causal effects of Interleukins (ILs) on OSA by Mendelian Randomization (MR) analysis.

| Protein      | Method          | n SNP | estimate | se       | p-value  | Q        | Q df | Q pvalue | intercept | intercept se | intercept pvalue |
|--------------|-----------------|-------|----------|----------|----------|----------|------|----------|-----------|--------------|------------------|
| IL-1 $\beta$ | IVW             | 6     | 0.039273 | 0.071407 | 0.58233  | 4.729519 | 5    | 0.449773 | NA        | NA           | NA               |
|              | MR Egger        | 6     | 0.010862 | 0.165456 | 0.950806 | 4.685345 | 4    | 0.321132 | 0.003512  | 0.018085     | 0.855486         |
|              | Weighted median | 6     | -0.01034 | 0.090972 | 0.909541 | NA       | NA   | NA       | NA        | NA           | NA               |
|              | MR RAPS         | 6     | 0.04114  | 0.077544 | 0.595737 | NA       | NA   | NA       | NA        | NA           | NA               |
| IL-2         | IVW             | 10    | 0.025366 | 0.030522 | 0.405922 | 8.744874 | 9    | 0.46115  | NA        | NA           | NA               |
|              | MR Egger        | 10    | -0.02266 | 0.062529 | 0.726473 | 7.970503 | 8    | 0.436357 | 0.009195  | 0.010449     | 0.404526         |
|              | Weighted median | 10    | 0.015117 | 0.042427 | 0.721622 | NA       | NA   | NA       | NA        | NA           | NA               |
|              | MR RAPS         | 10    | 0.026348 | 0.032207 | 0.413315 | NA       | NA   | NA       | NA        | NA           | NA               |
| IL-4         | IVW             | 10    | 0.048121 | 0.049969 | 0.335534 | 8.623139 | 9    | 0.472763 | NA        | NA           | NA               |
|              | MR Egger        | 10    | 0.038261 | 0.155176 | 0.811454 | 8.618242 | 8    | 0.375516 | 0.001188  | 0.017623     | 0.947902         |
|              | Weighted median | 10    | 0.097065 | 0.069729 | 0.163913 | NA       | NA   | NA       | NA        | NA           | NA               |
|              | MR RAPS         | 10    | 0.049889 | 0.052471 | 0.341707 | NA       | NA   | NA       | NA        | NA           | NA               |
| IL-5         | IVW             | 6     | 0.04977  | 0.04044  | 0.218428 | 4.132199 | 5    | 0.530544 | NA        | NA           | NA               |
|              | MR Egger        | 6     | 0.11575  | 0.098205 | 0.30386  | 3.588629 | 4    | 0.464531 | -0.01202  | 0.016299     | 0.501866         |
|              | Weighted median | 6     | 0.053002 | 0.051258 | 0.30113  | NA       | NA   | NA       | NA        | NA           | NA               |
|              | MR RAPS         | 6     | 0.051101 | 0.042606 | 0.230381 | NA       | NA   | NA       | NA        | NA           | NA               |
| IL-6         | IVW             | 7     | 0.049626 | 0.056975 | 0.383748 | 4.270568 | 6    | 0.640113 | NA        | NA           | NA               |
|              | MR Egger        | 7     | 0.137867 | 0.114846 | 0.283733 | 3.487501 | 5    | 0.62528  | -0.01274  | 0.0144       | 0.416724         |
|              | Weighted median | 7     | -0.0041  | 0.073238 | 0.955339 | NA       | NA   | NA       | NA        | NA           | NA               |
|              | MR RAPS         | 7     | 0.05088  | 0.060119 | 0.397368 | NA       | NA   | NA       | NA        | NA           | NA               |
| IL-8         | IVW             | 3     | -0.04366 | 0.062591 | 0.485495 | 0.012108 | 2    | 0.993964 | NA        | NA           | NA               |
|              | MR Egger        | 3     | -0.0327  | 0.141117 | 0.855047 | 0.0046   | 1    | 0.945925 | -0.00181  | 0.020926     | 0.944975         |
|              | Weighted median | 3     | -0.04219 | 0.073343 | 0.565098 | NA       | NA   | NA       | NA        | NA           | NA               |
|              | MR RAPS         | 3     | -0.04366 | 0.067172 | 0.515668 | NA       | NA   | NA       | NA        | NA           | NA               |
| IL-10        | IVW             | 3     | 0.013154 | 0.038659 | 0.73367  | 0.322278 | 2    | 0.851174 | NA        | NA           | NA               |
|              | MR Egger        | 3     | 0.016079 | 0.08902  | 0.886242 | 0.320948 | 1    | 0.571039 | -0.00063  | 0.017151     | 0.976788         |
|              | Weighted median | 3     | 0.013093 | 0.040712 | 0.747757 | NA       | NA   | NA       | NA        | NA           | NA               |
|              | MR RAPS         | 3     | 0.013164 | 0.039095 | 0.736329 | NA       | NA   | NA       | NA        | NA           | NA               |
| IL-17        | IVW             | 11    | -0.02222 | 0.058493 | 0.704012 | 20.83394 | 10   | 0.022282 | NA        | NA           | NA               |
|              | MR Egger        | 11    | -0.10367 | 0.123623 | 0.423427 | 19.59996 | 9    | 0.020548 | 0.015001  | 0.019929     | 0.470833         |
|              | Weighted median | 11    | -0.04364 | 0.062549 | 0.485318 | NA       | NA   | NA       | NA        | NA           | NA               |
|              | MR RAPS         | 11    | -0.02367 | 0.041822 | 0.571341 | NA       | NA   | NA       | NA        | NA           | NA               |
| IL-18        | IVW             | 12    | -0.0137  | 0.024079 | 0.569385 | 12.45084 | 11   | 0.330726 | NA        | NA           | NA               |
|              | MR Egger        | 12    | -0.06025 | 0.058702 | 0.328903 | 11.57198 | 10   | 0.314723 | 0.010985  | 0.012605     | 0.403929         |
|              | Weighted median | 12    | -0.03063 | 0.02991  | 0.305738 | NA       | NA   | NA       | NA        | NA           | NA               |
|              | MR RAPS         | 12    | -0.01404 | 0.023179 | 0.544612 | NA       | NA   | NA       | NA        | NA           | NA               |

Causality of interleukins on OSA : causality was analyzed with OSA as exposure, ILs as outcomes; or Causality of ILs on OSA: interleukins respectively as

exposure and OSA as outcome. Each pair was analyzed by several MR methods. IVW: inverse variance weighted. MR RAPS: MR-Robust Adjusted Profile Score.

**Supplemental Table 8.** Verification of the causal effects of IL-6, IL-8 and IL-18 on OSA using another large-sample GWAS

| Protein | Method          | estimate | se    | p-value | Q      | Q_df | Q_pvalue | intercept | intercept_se | intercept_pvalue |
|---------|-----------------|----------|-------|---------|--------|------|----------|-----------|--------------|------------------|
| IL-6    | IVW             | -0.158   | 0.100 | 0.114   | 0.060  | 2    | 0.970    | NA        | NA           | NA               |
|         | MR Egger        | -0.447   | 2.503 | 0.888   | 0.0470 | 1    | 0.828    | 0.024     | 0.211        | 0.927            |
|         | Weighted median | -0.166   | 0.115 | 0.147   | NA     | NA   | NA       | NA        | NA           | NA               |
|         | MR RAPS         | -0.063   | 0.061 | 0.308   | NA     | NA   | NA       | NA        | NA           | NA               |
| IL-8    | IVW             | -0.018   | 0.163 | 0.912   | 5.074  | 2    | 0.079    | NA        | NA           | NA               |
|         | MR Egger        | 0.802    | 0.482 | 0.344   | 1.247  | 1    | 0.264    | -0.125    | 0.072        | 0.330            |
|         | Weighted median | 0.033    | 0.134 | 0.804   | NA     | NA   | NA       | NA        | NA           | NA               |
|         | MR RAPS         | -0.026   | 0.062 | 0.679   | NA     | NA   | NA       | NA        | NA           | NA               |
| IL-18   | IVW             | -0.025   | 0.018 | 0.157   | 74.478 | 65   | 0.197    | NA        | NA           | NA               |
|         | MR Egger        | -0.051   | 0.049 | 0.300   | 74.112 | 64   | 0.182    | 0.004     | 0.006        | 0.576            |
|         | Weighted median | -0.031   | 0.026 | 0.233   | NA     | NA   | NA       | NA        | NA           | NA               |
|         | MR RAPS         | -0.031   | 0.014 | 0.025   | NA     | NA   | NA       | NA        | NA           | NA               |

Causality of interleukins on OSA : causality was analyzed with OSA as exposure, ILs as outcomes; or Causality of ILs on OSA: interleukins respectively as exposure and OSA as outcome. Each pair was analyzed by several MR methods. IVW: inverse variance weighted. MR RAPS: MR-Robust Adjusted Profile Score.
