# Supplementary material for: Causal analysis between altered levels of interleukins and obstructive sleep apnea
Source: PubMed Central journal article supplement (PMC9363575; doi:10.3389/fimmu.2022.888644), 2022-07-27
Supplement: DataSheet_2.pdf [file DataSheet_2.pdf]

## Supplemental material 2: Supplemental Figures.

### A. IL-1 $\beta$

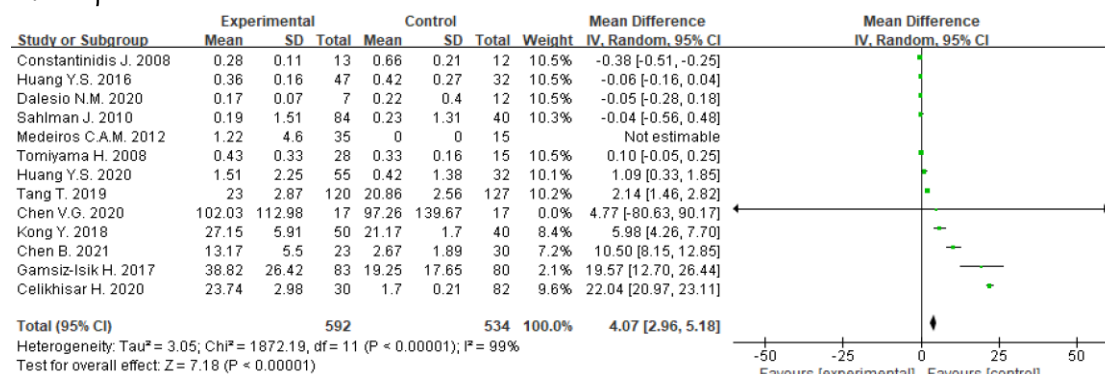

### B. IL-2

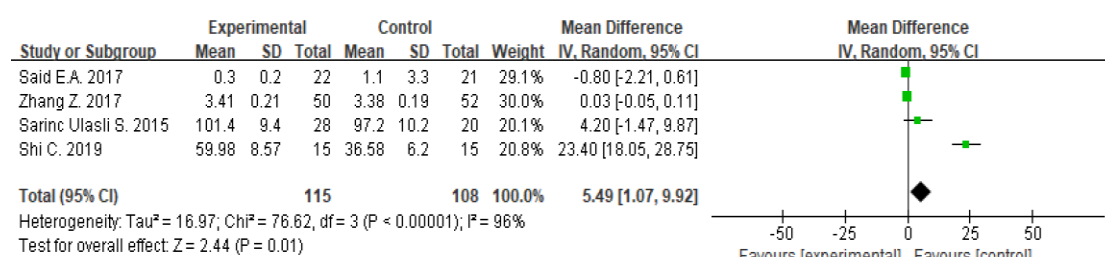

### C. IL-4

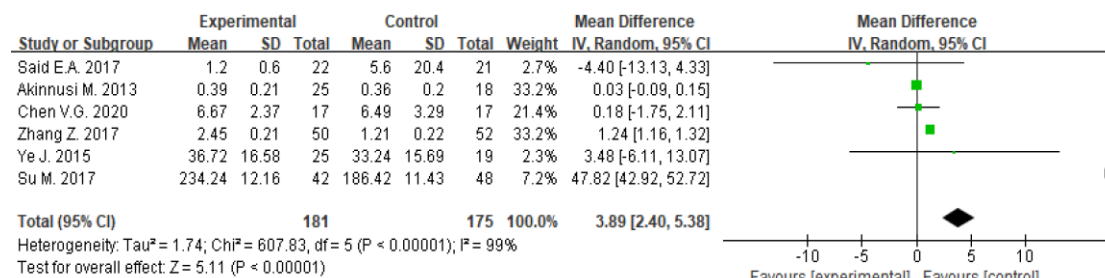

## D. IL-6

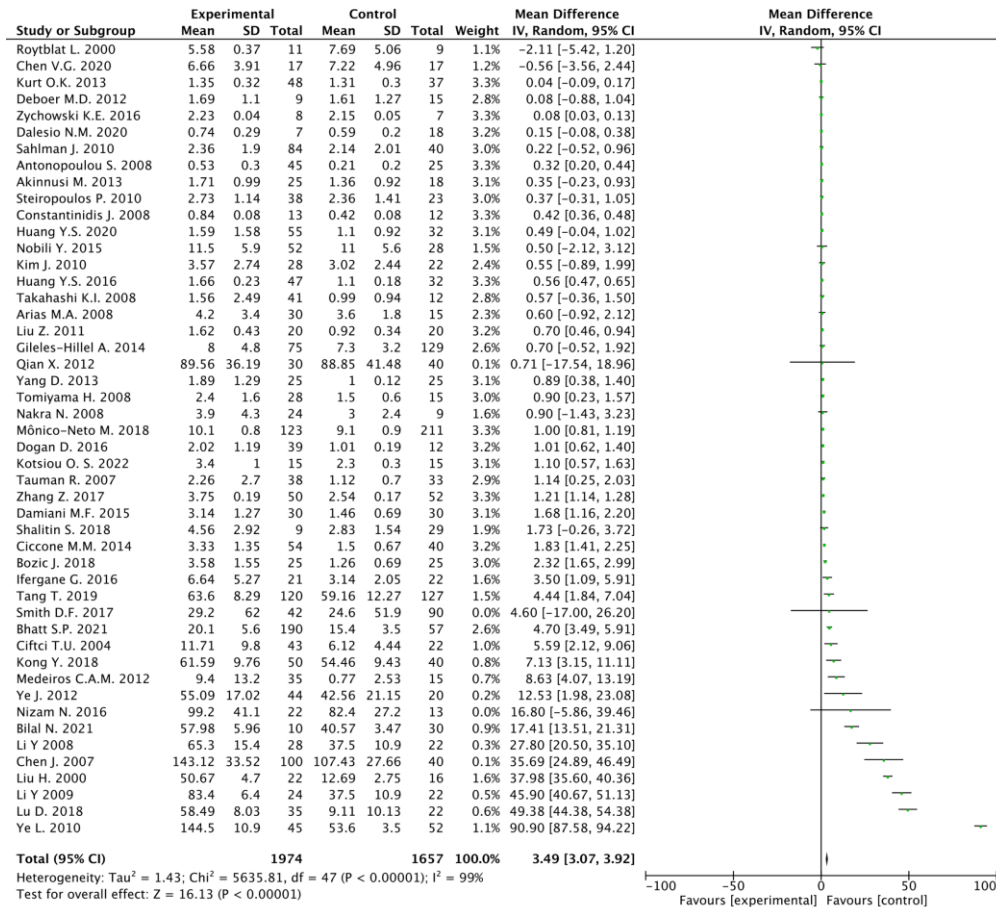

## E. IL-8

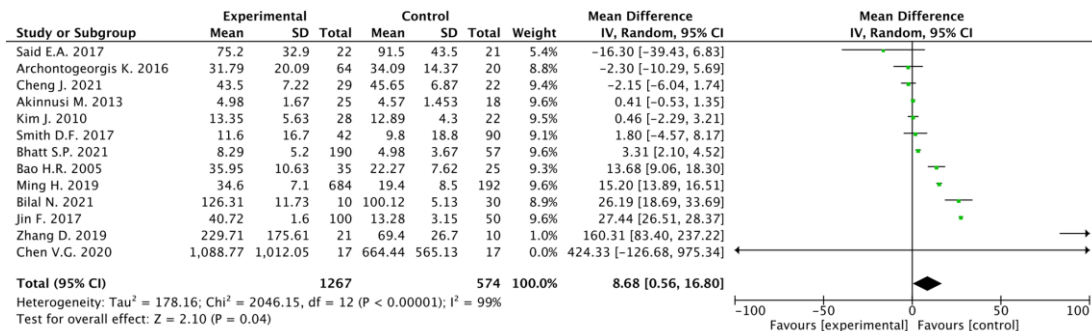

## F. IL-10

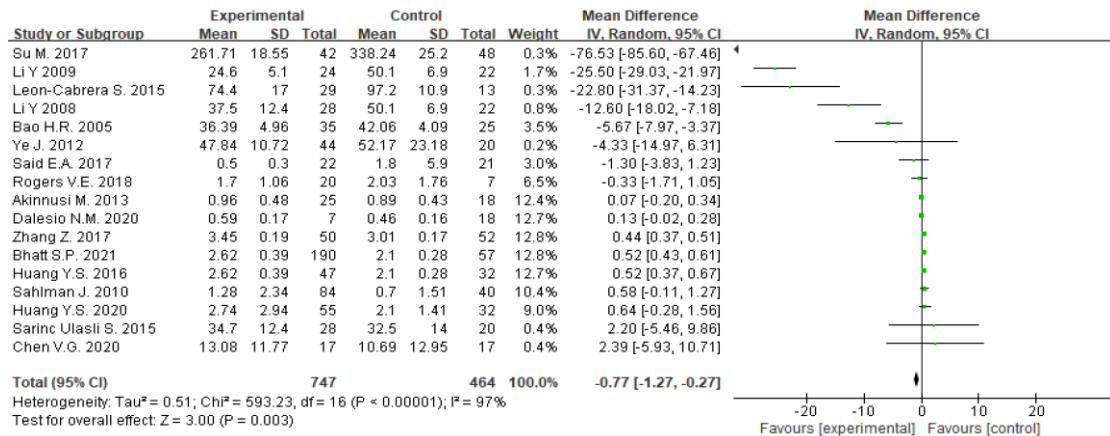

### G. IL-12

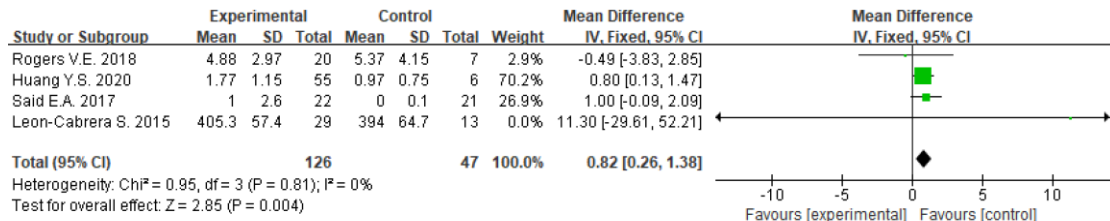

### H. IL-17

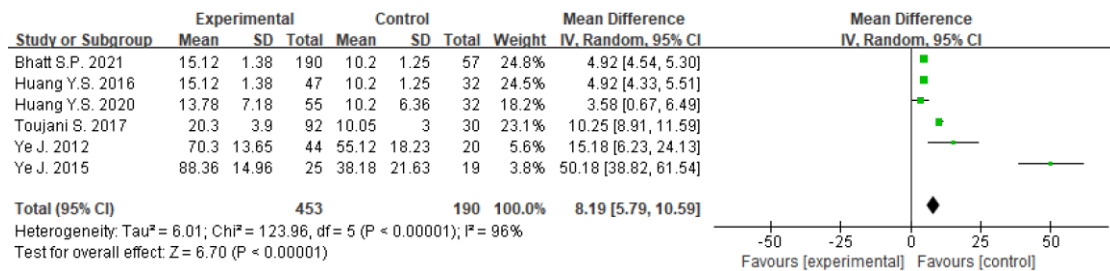

### I. IL-18

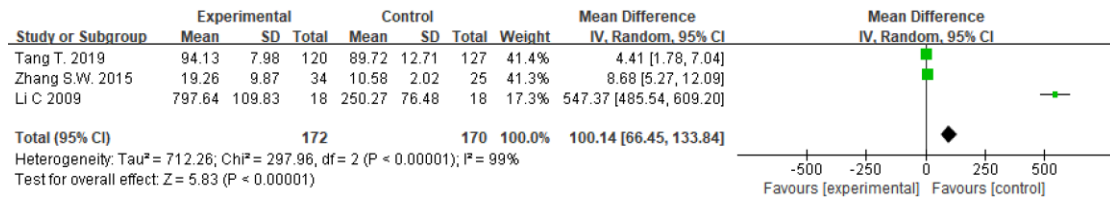

### J. IL-23

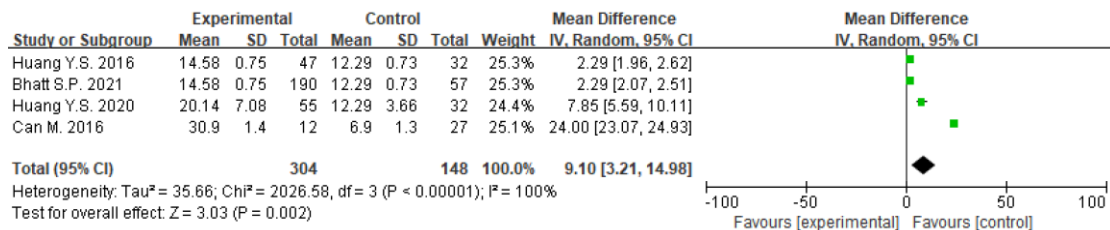

**Supplemental Figure 1.** Forest plots of interleukins (ILs) concentration differences between OSA patients and controls. (A) IL-1 $\beta$ ; (B) IL-2; (C) IL-4; (D) IL-6; (E) IL-8; (F) IL-10; (G) IL-12; (H) IL-17; (I) IL-18; (J) IL-23.

The study of Medeiros C.A.M made no contribution to the pooled analysis in IL-1 $\beta$ .

**A. IL-1 $\beta$**

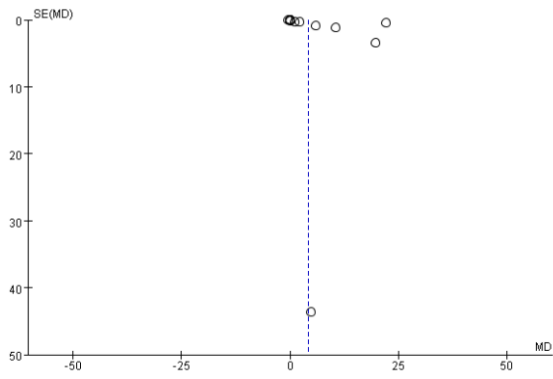

**B. IL-2**

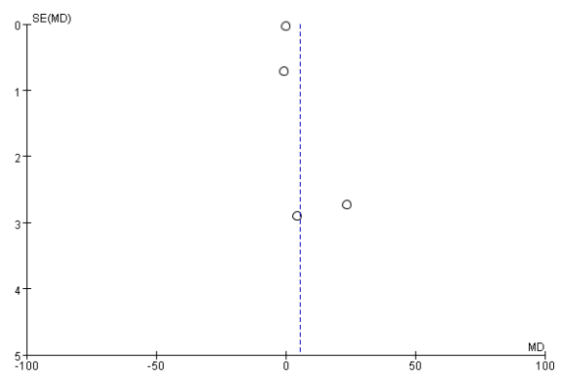

**C. IL-4**

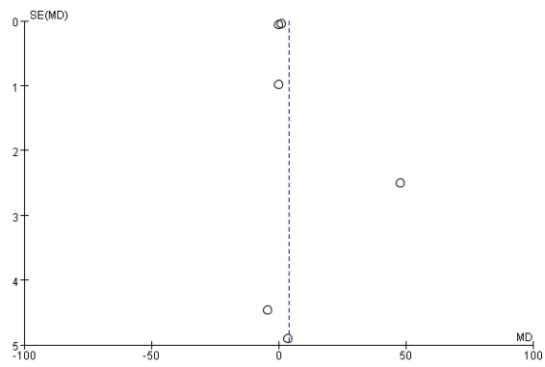

**D. IL-6**

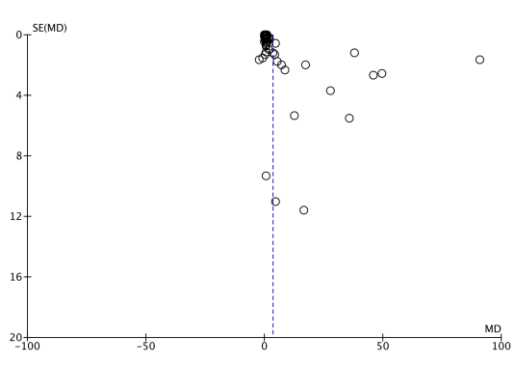

**E. IL-8**

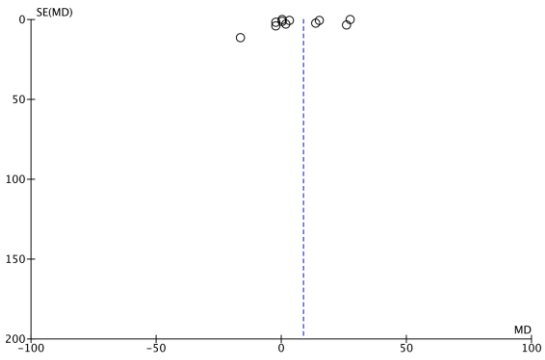

**F. IL-10**

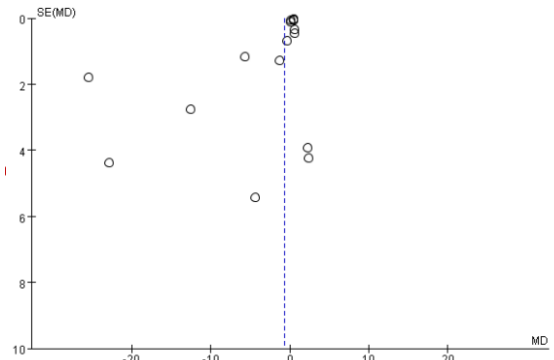

**G. IL-12**

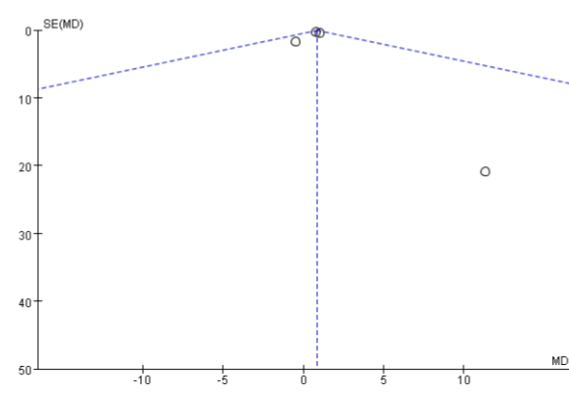

**H. IL-17**

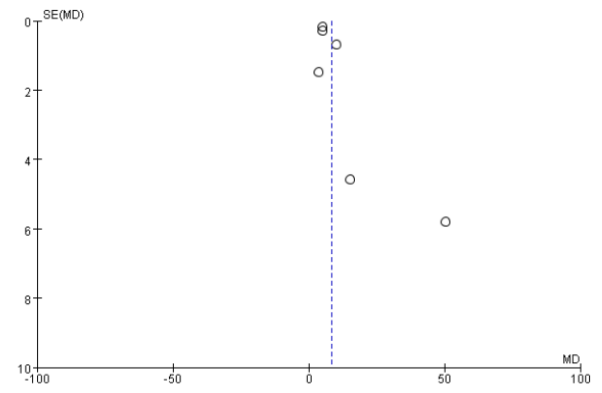

### I. IL-18

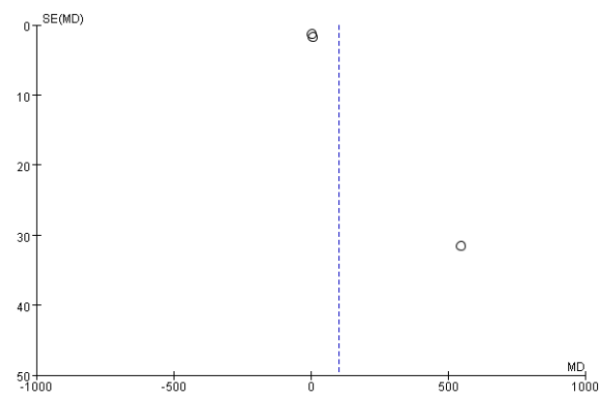

### J. IL-23

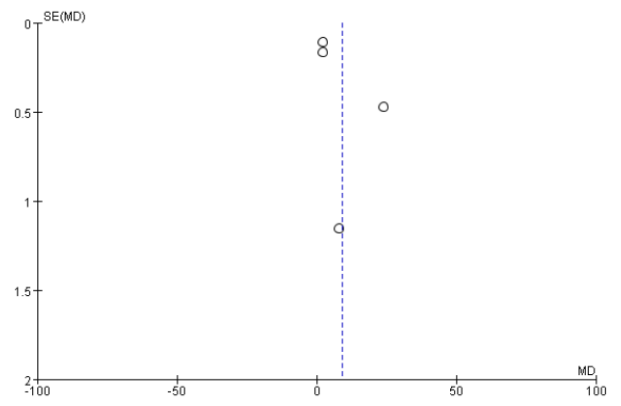

**Supplemental Figure 2.** Funnel plots of Interleukins (ILs) concentration differences between OSA patients and controls. (A) IL-1 $\beta$ ; (B) IL-2; (C) IL-4; (D) IL-6; (E) IL-8; (F) IL-10; (G) IL-12; (H) IL-17; (I) IL-18; (J) IL-23.

## A. IL-1 $\beta$

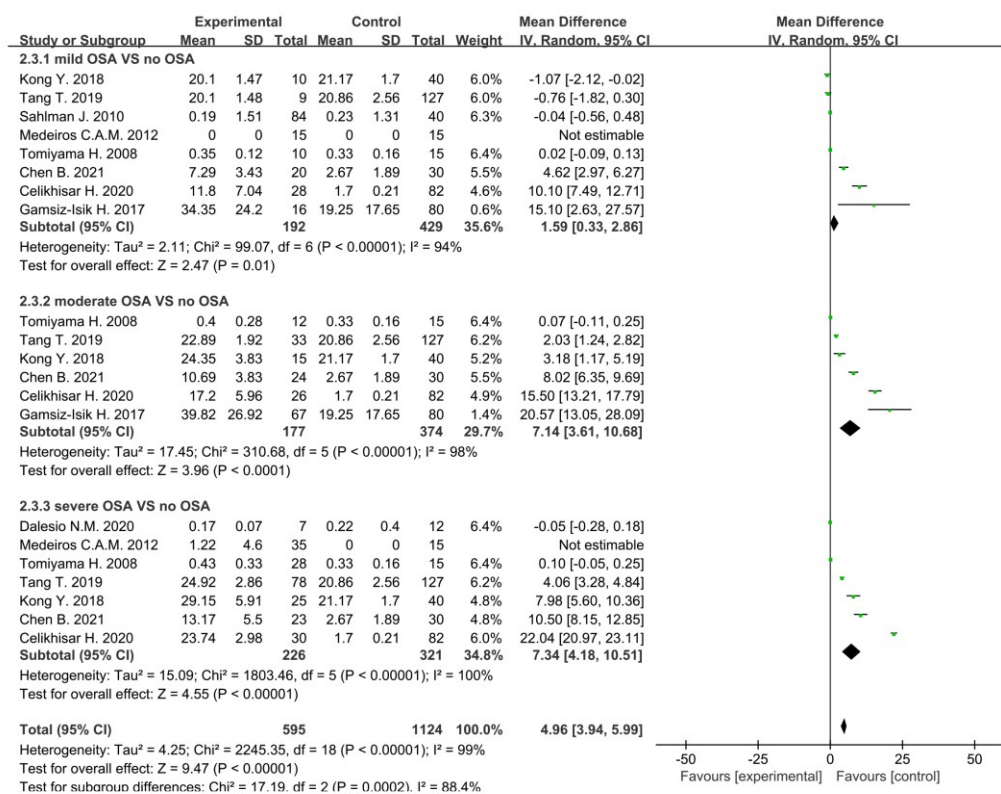

**B. IL-6**

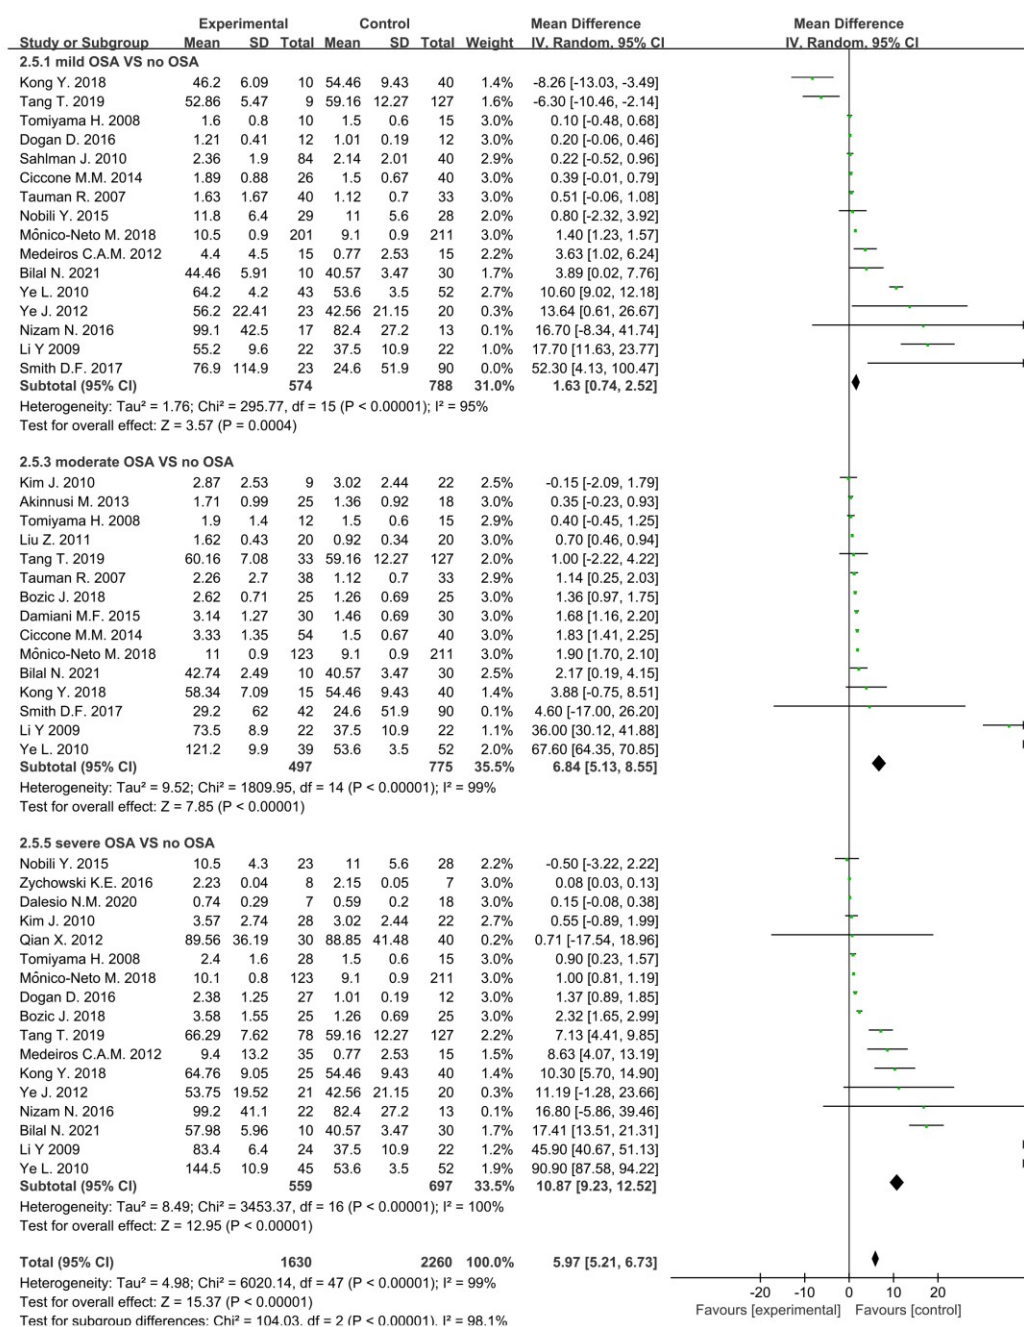

**Supplemental Figure 3.** Forest plots of IL-1 $\beta$  for IL-6 concentration differences between mild, moderate, severe OSA patients and controls. (A) IL-1 $\beta$ ; (B) IL-6. The study of Medeiros C.A.M made no contribution to the pooled analysis in IL-1 $\beta$ .

## A. IL-8

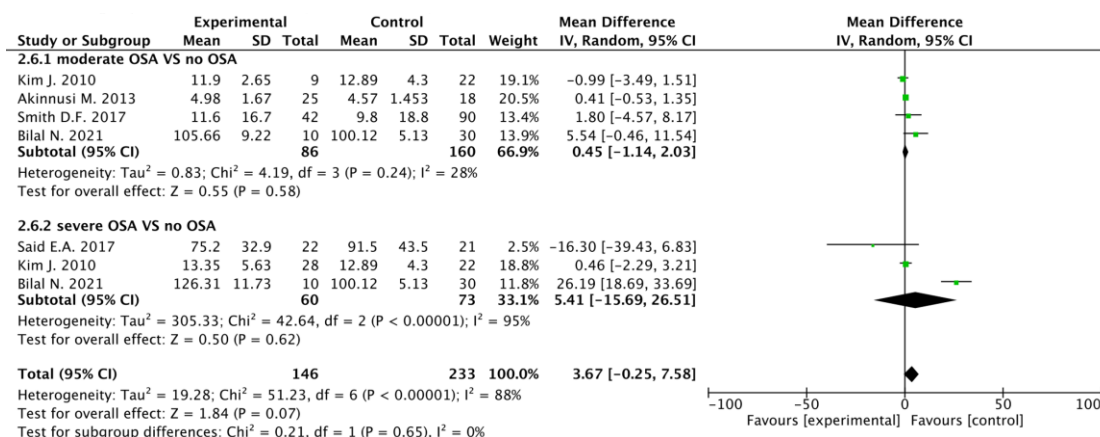

## B. IL-10

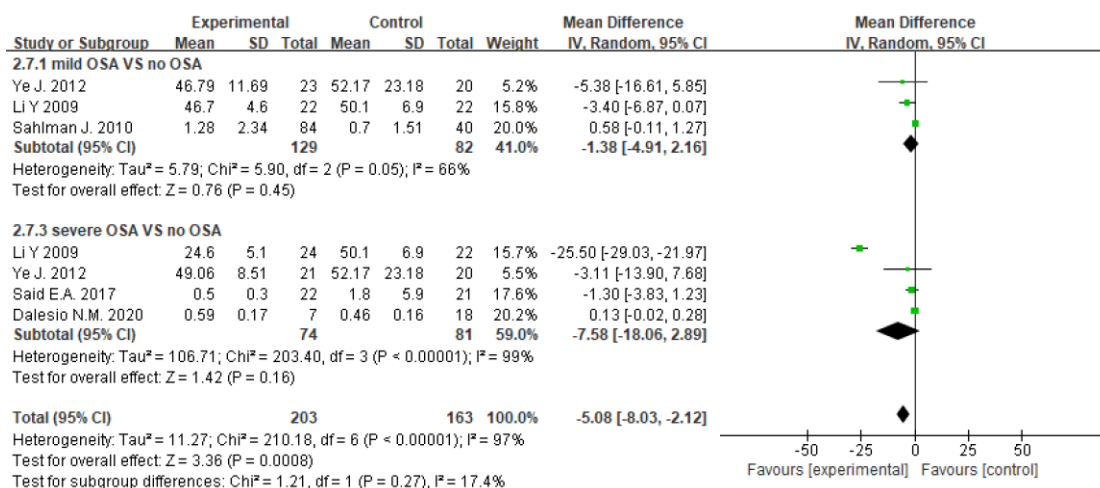

## C. IL-18

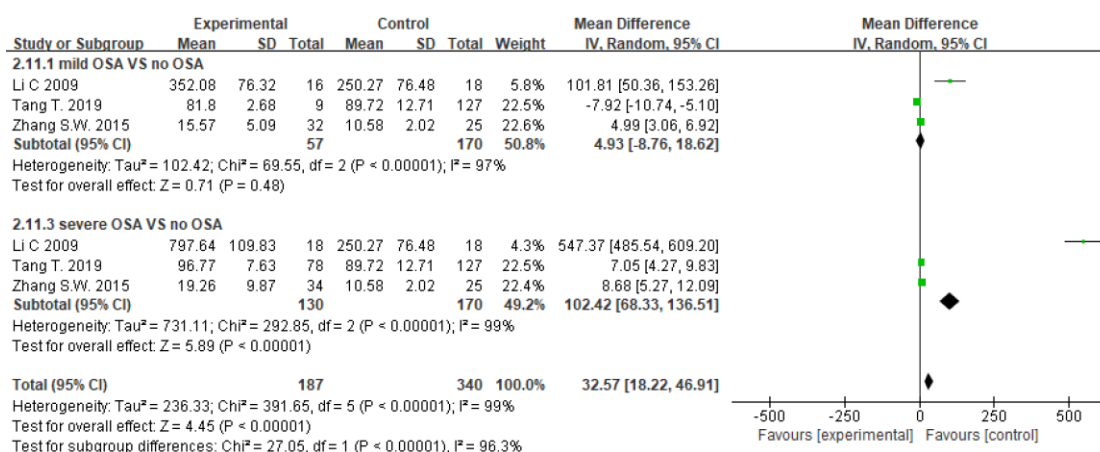

**Supplemental Figure 4.** Forest plots of interleukins (ILs) concentration differences between 2 subgroups of OSA patients and controls. (A) IL-8 in moderate, severe subgroups; (B) and (C) IL-10, IL-18 in mild, severe subgroups.



### A. IL-1 $\beta$

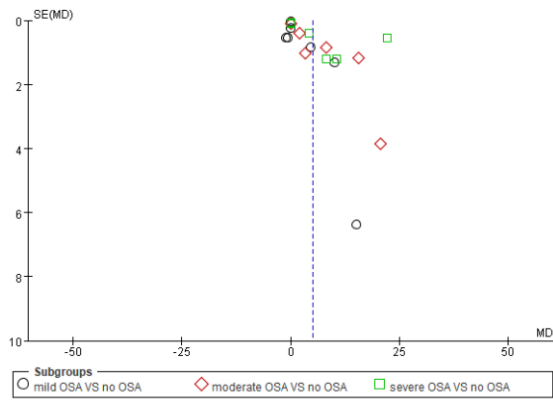

### B. IL-6

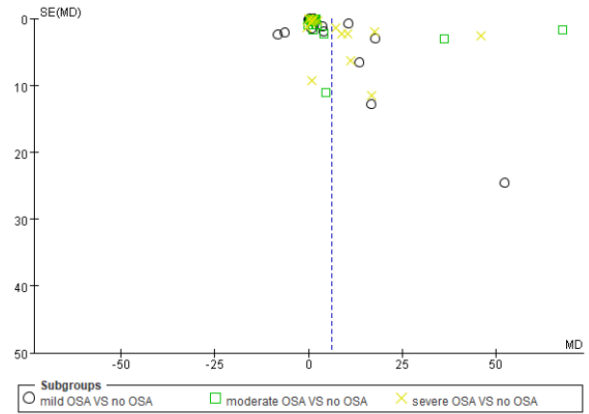

### C. IL-8

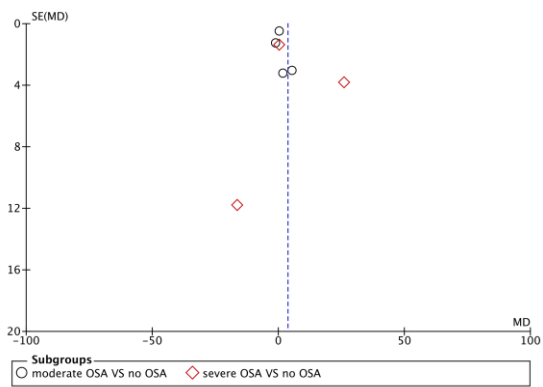

### D. IL-10

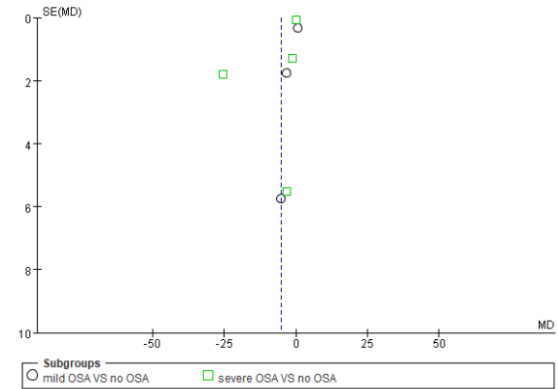

### E. IL-18

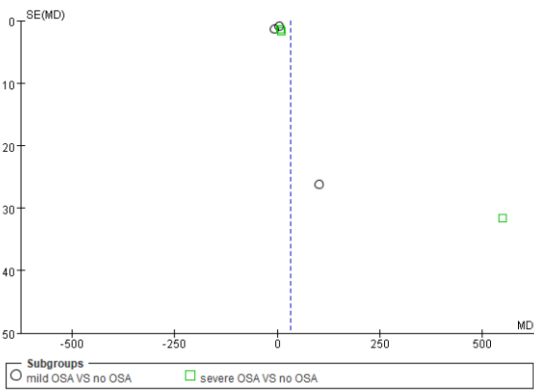

**Supplemental Figure 5.** Funnel plots of Interleukins (ILs) concentration differences between mild, moderate, severe OSA patients and controls. (A) IL-1 $\beta$ ; (B) IL-6; (C) IL-8; (D) IL-10; (E) IL-18.

## A. IL-1 $\beta$

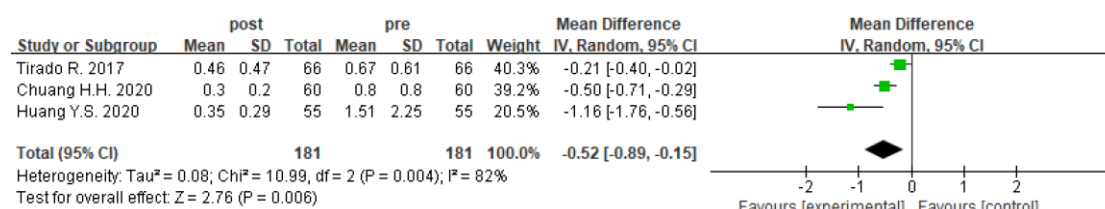

## B. IL-6

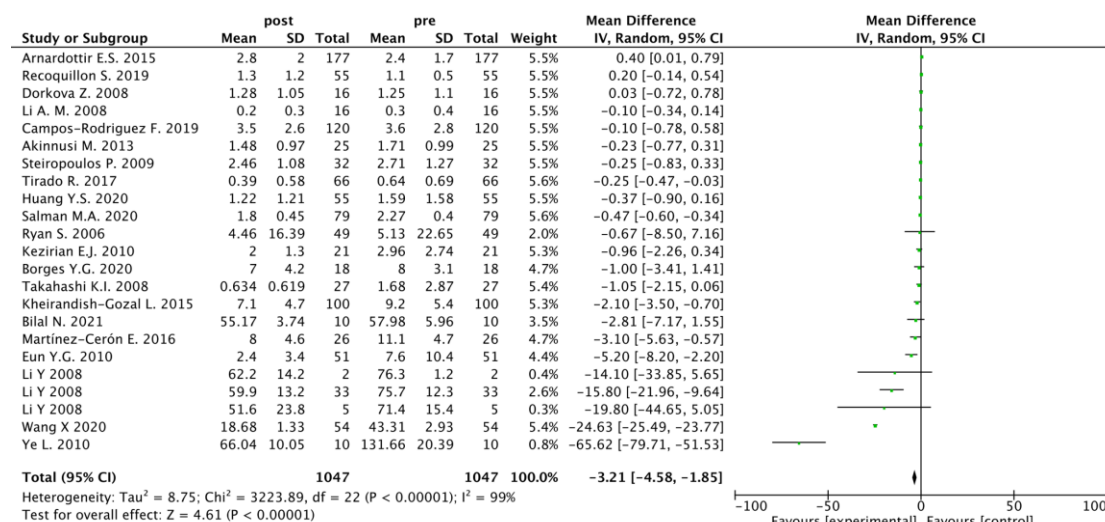

## C. IL-8

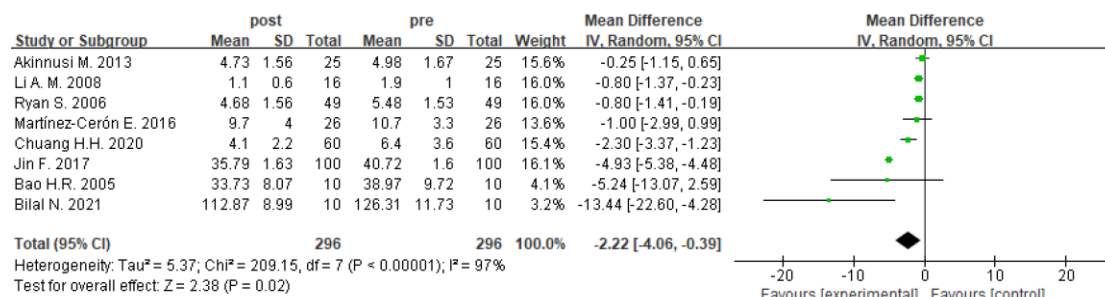

## D. IL-10

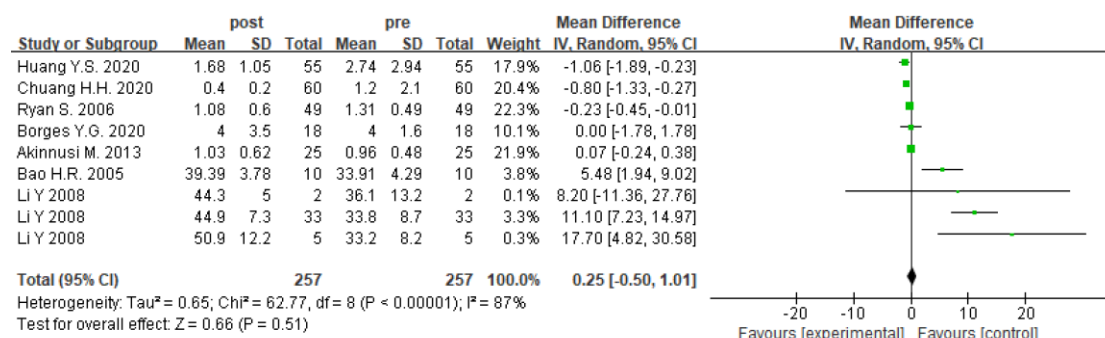

**Supplemental Figure 6.** Forest plots of interleukins (ILs) treatment concentration differences between post and pre OSA patients. (A) IL-1 $\beta$ ; (B) IL-6; (C) IL-8; (D) IL-10

A. IL-1 $\beta$

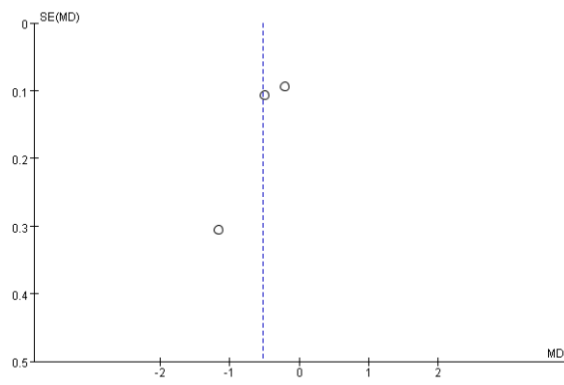

B. IL-6

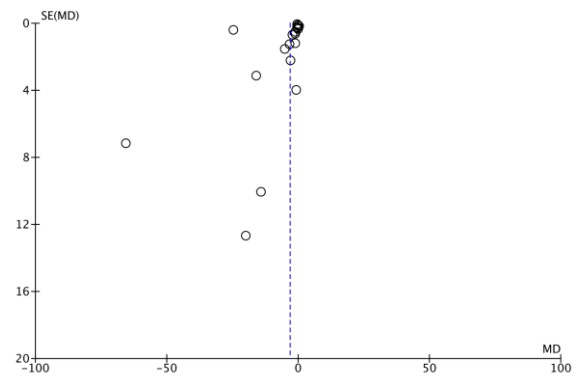

C. IL-8

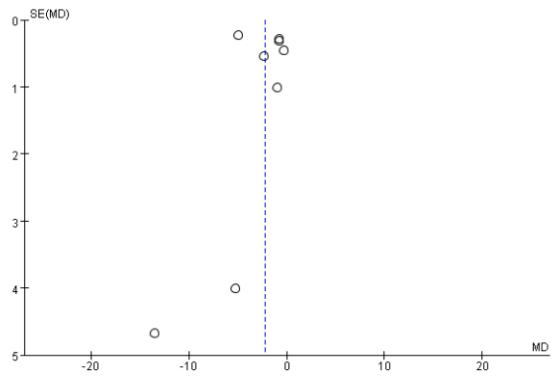

D. IL-10

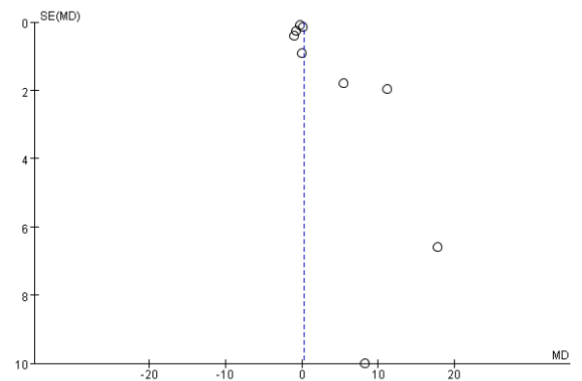

**Supplemental Figure 7.** Funnel plots of Interleukins (ILs) treatment concentration differences between post and pre OSA patients. (A) IL-1 $\beta$ ; (B) IL-6; (C) IL-8; (D) IL-10.

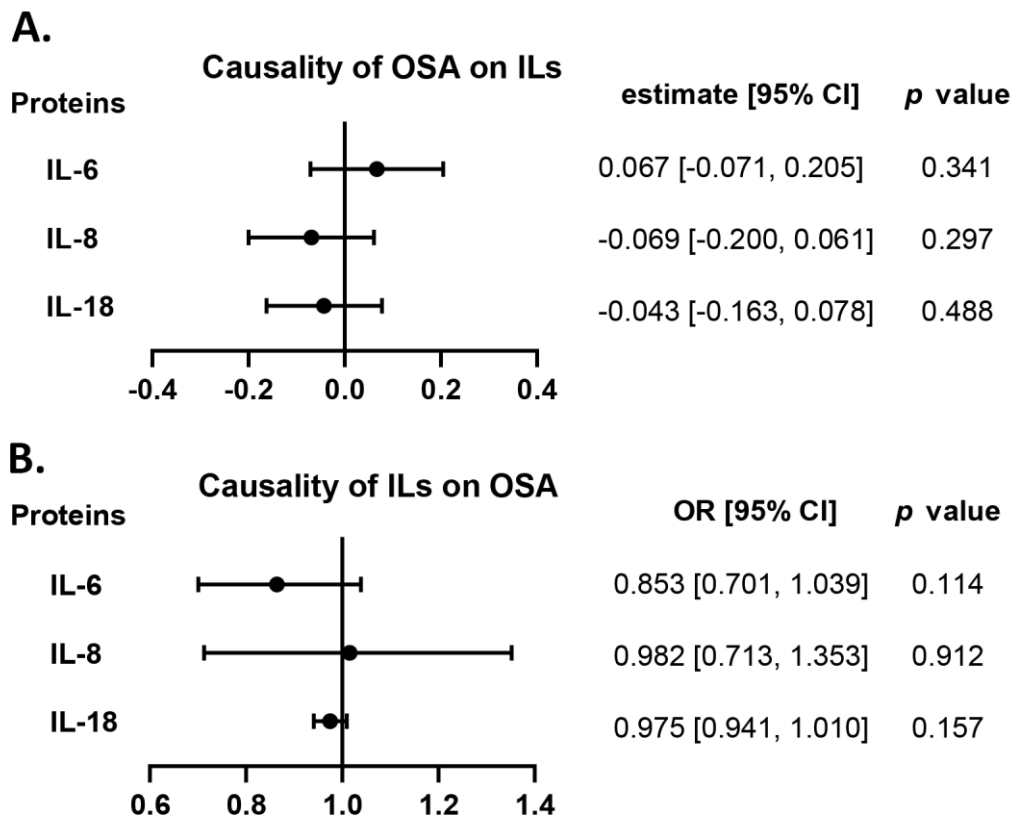

**Supplemental Figure 8. Verification of the negative results about the causal relationships between OSA and Interleukins (ILs) of IL-6, IL-8 and IL-18 using another large-sample GWAS**

(A). Causality was analyzed with OSA as exposure, IL-6, IL-8, IL-18 individually as outcomes by MR.

(B). Causality was analyzed with IL-6, IL-8, IL-18 respectively as exposure and OSA as outcome by MR. The presented results were performed by method of inverse variance weighted (IVW). The statistically threshold was  $p < 0.05$ .
